# Supplementary material for: Metal dimers embedded vertically in defect-graphene as gas sensors: a first-principles study
Source: Royal Society of Chemistry journal article supplement (doi:10.1039/d2cp00672c), 2022-01-01
Supplement: d2cp00672c1.pdf [file d2cp00672c1.pdf]

## Appendix A. Supplementary material

### Metal Dimers Embedded Vertically in Defect-graphene as Gas Sensors: A First-Principles Study

Linke Yu, Fengyu Li\*

*School of Physical Science and Technology, Inner Mongolia University, Hohhot, 010021, China*

\*Corresponding Author: fengyuli@imu.edu.cn (FL)

**Table S1** The binding energy ( $E_b$ ) per M atom of  $M_2 \perp$  gra species, the cohesive energy ( $E_{coh}$ ) of M metals (in eV).

| structure | $E_b$        | $E_{coh}$ | structure | $E_b$        | $E_{coh}$ | structure | $E_b$        | $E_{coh}$ |
|-----------|--------------|-----------|-----------|--------------|-----------|-----------|--------------|-----------|
| 2Sc-gra   | <b>-5.90</b> | -4.34     | 2Y-gra    | <b>-5.92</b> | -4.40     |           |              |           |
| 2Ti-gra   | <b>-5.93</b> | -5.51     | 2Zr-gra   | <b>-6.64</b> | -6.45     | 2Hf-gra   | <b>-7.07</b> | -6.71     |
| 2V-gra    | <b>-4.96</b> | -5.34     | 2Nb-gra   | -6.05        | -7.04     | 2Ta-gra   | -6.81        | -8.37     |
| 2Cr-gra   | -3.29        | -4.07     | 2Mo-gra   | -5.00        | -6.33     | 2W-gra    | -5.35        | -8.41     |
| 2Mn-gra   | <b>-4.28</b> | -3.79     | 2Tc-gra   | -5.44        | -6.88     | 2Re-gra   | -4.99        | -7.83     |
| 2Fe-gra   | <b>-4.90</b> | -4.61     | 2Ru-gra   | -6.44        | -7.08     | 2Os-gra   | -6.42        | -8.51     |
| 2Co-gra   | <b>-5.84</b> | -5.04     | 2Rh-gra   | <b>-6.52</b> | -5.93     | 2Ir-gra   | <b>-7.23</b> | -7.59     |
| 2Ni-gra   | <b>-6.17</b> | -5.04     | 2Pd-gra   | <b>-4.80</b> | -3.75     | 2Pt-gra   | <b>-6.31</b> | -5.52     |
| 2Cu-gra   | <b>-3.37</b> | -3.50     | 2Ag-gra   | <b>-2.03</b> | -2.49     | 2Au-gra   | -2.38        | -2.99     |
| 2Zn-gra   | <b>-0.98</b> | -1.11     | 2Cd-gra   | <b>-0.57</b> | -0.75     |           |              |           |

**Table S2** The Bader charge ( $Q$ ) on the M atoms, the band energy gap ( $E_g$ ), the magnetic order ( $MO$ ) and the magnetic moment on M atoms ( $M$ ) of the five  $M_2 \perp$  gra (M = Co, Ni, Rh, Ir and Pt) and  $M_1@$ gra (M = Co, Ni, Rh and Pt) structures.

| system                      | $Q$ ( $ e $ ) | $E_g$ (eV) | $MO$ | $M$ ( $\mu_B$ ) |
|-----------------------------|---------------|------------|------|-----------------|
| Co <sub>2</sub> $\perp$ gra | +0.67/+0.67   | 0.00       | FM   | 0.66/0.66       |
| Ni <sub>2</sub> $\perp$ gra | +0.68/+0.68   | 0.02       | NM   | 0.00/0.00       |
| Rh <sub>2</sub> $\perp$ gra | +0.35/+0.35   | 0.00       | FM   | 0.24/0.24       |
| Ir <sub>2</sub> $\perp$ gra | +0.39/+0.39   | 0.00       | FM   | 0.24/0.24       |
| Pt <sub>2</sub> $\perp$ gra | +0.30/+0.30   | 0.22       | NM   | 0.00/0.00       |
| Co <sub>1</sub> @gra        | +0.75         | 0.00       |      | 0.29            |
| Ni <sub>1</sub> @gra        | +0.74         | 0.25       | NM   | 0.00            |
| Rh <sub>1</sub> @gra        | +0.43         | 0.00       |      | 0.17            |
| Ir <sub>1</sub> @gra        | +0.82         | 0.00       |      | 0.26            |
| Pt <sub>1</sub> @gra        | +0.50         | 0.18       | NM   | 0.00            |

**Table S3** The magnetic anisotropy energy (MAE, in meV/M atom) for the  $M_2 \perp$  gra and  $M_2$ -gra with two M atoms on two sides and one side of graphene, respectively.

| system                      | E(100)–E(001) | E(011)–E(001) | E(010)–E(001) | E(101)–E(001) | E(110)–E(001) | E(111)–E(001) |
|-----------------------------|---------------|---------------|---------------|---------------|---------------|---------------|
| Co <sub>2</sub> $\perp$ gra | 2.81          | 1.28          | 2.79          | 1.28          | 2.80          | 1.75          |
| Co <sub>2</sub> -gra        | 0.58          | 0.34          | 0.60          | 0.14          | 0.59          | 0.32          |
| Rh <sub>2</sub> -gra        | 5.39          | 2.72          | 5.38          | 2.52          | 5.37          | 3.50          |
| Ir <sub>2</sub> -gra        | 16.71         | 13.78         | 21.95         | 13.15         | 21.47         | 19.84         |

  

| system                      | E(100)–E(010) | E(011)–E(010) | E(001)–E(010) | E(101)–E(010) | E(110)–E(010) | E(111)–E(010) |
|-----------------------------|---------------|---------------|---------------|---------------|---------------|---------------|
| Rh <sub>2</sub> $\perp$ gra | 0.01          | 0.11          | 0.20          | 0.11          | 0.01          | 0.08          |
| Ir <sub>2</sub> $\perp$ gra | 0.01          | 4.86          | 13.63         | 4.86          | 0.01          | 2.89          |

**Table S4** The magnetic moment on M atoms of the three  $M_2 \perp$  gra (M = Co, Rh and Ir) and three  $M_2$ -gra (M = Co, Rh and Ir) structures.

| system          | Co        | Rh        | Ir        |
|-----------------|-----------|-----------|-----------|
| $M_2 \perp$ gra | 0.66/0.66 | 0.24/0.24 | 0.24/0.24 |
| $M_2$ -gra      | 0.03/1.91 | 0.04/1.33 | 0.08/1.50 |

**Table S5** The binding energy ( $E_b$ ) per M atom of  $M_2 \perp$  gra,  $M_2$ -gra and  $M_1@$ gra species.

| $E_b$           | Co    | Ni    | Rh    | Ir     | Pt    |
|-----------------|-------|-------|-------|--------|-------|
| $M_2 \perp$ gra | -5.84 | -6.17 | -6.52 | -7.23  | -6.31 |
| $M_2$ -gra      | -5.13 |       | -5.81 | -7.12  |       |
| $M_1@$ gra      | -8.25 | -7.52 | -9.05 | -10.28 | -7.97 |

**Table S6** The adsorption energy ( $E_{ad}$ ), the charge transferred from the monolayer to molecule ( $\Delta Q$ ), the shortest distance between the molecule and monolayer ( $D$ ), the band-gap widths ( $E_g$ ), the recovery time ( $\tau$ ), the magnetic order ( $MO$ ) and the magnetic moment on M atoms ( $M$ ) for the structures of the molecules adsorbed on the  $\text{Co}_2 \perp \text{gra}$ .

| system               | $E_{ad}$ (eV) | $\Delta Q$ ( $ e $ ) | $D$ ( $\text{\AA}$ ) | $E_g$ (eV) | $\tau$ (s) 300 K      | $\tau$ (s) 500 K      | $MO$ | $M$ ( $\mu_B$ ) |
|----------------------|---------------|----------------------|----------------------|------------|-----------------------|-----------------------|------|-----------------|
| $\text{O}_2$         | -2.04         | -0.69                | 1.86                 | 0.00       | $3.72 \times 10^{21}$ | $1.41 \times 10^9$    | FM   | 0.73/0.39       |
| $\text{N}_2$         | -1.49         | -0.27                | 1.80                 | 0.30       | $1.78 \times 10^{12}$ | $1.50 \times 10^3$    | NM   |                 |
| CO                   | -2.23         | -0.27                | 1.79                 | 0.30       | $6.16 \times 10^{24}$ | $1.63 \times 10^{11}$ | NM   |                 |
| $\text{CO}_2$        | -1.02         | -0.51                | 1.90                 | 0.19       | $1.93 \times 10^4$    | $1.19 \times 10^{-2}$ | NM   |                 |
| NO                   | -3.05         | -0.36                | 1.66                 | 0.00       | $4.85 \times 10^{38}$ | $1.30 \times 10^{20}$ | FM   | 0.02/0.27       |
| $\text{NO}_2$        | -2.87         | -0.59                | 1.86                 | 0.00       | $4.32 \times 10^{35}$ | $1.45 \times 10^{18}$ | FM   | 0.05/0.06       |
| $\text{NH}_3$        | -1.66         | +0.11                | 2.00                 | 0.34       | $1.35 \times 10^{15}$ | $1.05 \times 10^5$    | NM   |                 |
| $\text{H}_2\text{O}$ | -1.07         | +0.05                | 1.98                 | 0.31       | $1.35 \times 10^5$    | $4.12 \times 10^{-2}$ | NM   |                 |
| $\text{H}_2\text{S}$ | -1.41         | -0.00                | 2.17                 | 0.29       | $7.83 \times 10^{10}$ | $2.04 \times 10^2$    | NM   |                 |
| $\text{SO}_2$        | -1.57         | -2.34                | 2.06                 | 0.26       | $4.03 \times 10^{13}$ | $1.11 \times 10^4$    | NM   |                 |

**Table S7** The adsorption energy ( $E_{ad}$ ), the charge transferred from the monolayer to molecule ( $\Delta Q$ ), the shortest distance between the molecule and monolayer ( $D$ ), the band-gap widths ( $E_g$ ), the recovery time ( $\tau$ ), the magnetic order ( $MO$ ) and the magnetic moment on M atoms ( $M$ ) for the structures of the molecules adsorbed on the  $\text{Ni}_2 \perp \text{gra}$ .

| system               | $E_{ad}$ (eV) | $\Delta Q$ ( $ e $ ) | $D$ ( $\text{\AA}$ ) | $E_g$ (eV) | $\tau$ (s) 300 K       | $\tau$ (s) 500 K       | $MO$ | $M$ ( $\mu_B$ ) |
|----------------------|---------------|----------------------|----------------------|------------|------------------------|------------------------|------|-----------------|
| $\text{O}_2$         | -1.30         | -0.62                | 1.93                 | 0.00       | $1.07 \times 10^9$     | 13.0                   | FM   | +0.14/+0.06     |
| $\text{N}_2$         | -0.73         | -0.27                | 1.85                 | 0.09       | $2.35 \times 10^{-1}$  | $8.43 \times 10^{-6}$  | NM   |                 |
| CO                   | -1.46         | -0.27                | 1.81                 | 0.10       | $5.51 \times 10^{11}$  | $7.11 \times 10^2$     | NM   |                 |
| $\text{CO}_2$        | -0.22         | -0.51                | 2.02                 | 0.01       | $5.35 \times 10^{-10}$ | $2.45 \times 10^{-11}$ | NM   |                 |
| NO                   | -2.08         | -0.40                | 1.74                 | 0.08       | $1.77 \times 10^{22}$  | $3.83 \times 10^9$     | AFM  | -0.05/+0.13     |
| $\text{NO}_2$        | -2.09         | -0.58                | 1.94                 | 0.00       | $2.61 \times 10^{22}$  | $4.92 \times 10^9$     | FM   | +0.21/+0.14     |
| $\text{NH}_3$        | -1.20         | +0.11                | 2.05                 | 0.02       | $2.16 \times 10^7$     | 1.07                   | NM   |                 |
| $\text{H}_2\text{O}$ | -0.68         | +0.05                | 2.04                 | 0.00       | $3.31 \times 10^{-2}$  | $2.40 \times 10^{-6}$  | NM   |                 |
| $\text{H}_2\text{S}$ | -0.94         | +0.00                | 2.25                 | 0.03       | $8.50 \times 10^2$     | $1.61 \times 10^{-3}$  | NM   |                 |
| $\text{SO}_2$        | -1.03         | -2.34                | 2.20                 | 0.06       | $2.85 \times 10^4$     | $1.52 \times 10^{-2}$  | NM   |                 |

**Table S8** The adsorption energy ( $E_{ad}$ ), the charge transferred from the monolayer to molecule ( $\Delta Q$ ), the shortest distance between the molecule and monolayer ( $D$ ), the band-gap widths ( $E_g$ ), the recovery time ( $\tau$ ), the magnetic order ( $MO$ ) and the magnetic moment on M atoms ( $M$ ) for the structures of the molecules adsorbed on the Rh<sub>2</sub>  $\perp$  gra.

| system           | $E_{ad}$ (eV) | $\Delta Q$ ( $ e $ ) | $D$ ( $\text{\AA}$ ) | $E_g$ (eV) | $\tau$ (s) 300 K      | $MO$ | $M$ ( $\mu_B$ ) |
|------------------|---------------|----------------------|----------------------|------------|-----------------------|------|-----------------|
| O <sub>2</sub>   | -1.48         | -0.47                | 1.95                 | 0.00       | $1.20 \times 10^{12}$ | FM   | +0.01/+0.01     |
| N <sub>2</sub>   | -0.92         | -0.19                | 2.00                 | 0.23       | $3.89 \times 10^2$    | NM   |                 |
| CO               | -1.78         | -0.19                | 1.79                 | 0.24       | $1.46 \times 10^{17}$ | NM   |                 |
| CO <sub>2</sub>  | -0.38         | -0.39                | 2.02                 | 0.00       | $2.75 \times 10^{-7}$ | NM   |                 |
| NO               | -2.65         | -0.29                | 1.74                 | 0.00       | $8.08 \times 10^{31}$ | NM   |                 |
| NO <sub>2</sub>  | -2.57         | -0.50                | 1.94                 | 0.00       | $3.56 \times 10^{30}$ | NM   |                 |
| NH <sub>3</sub>  | -1.30         | +0.16                | 2.05                 | 0.24       | $1.07 \times 10^9$    | NM   |                 |
| H <sub>2</sub> O | -0.70         | +0.06                | 2.04                 | 0.23       | $7.23 \times 10^{-2}$ | NM   |                 |
| H <sub>2</sub> S | -1.13         | +0.10                | 2.25                 | 0.23       | $1.41 \times 10^6$    | NM   |                 |
| SO <sub>2</sub>  | -1.23         | -2.29                | 2.20                 | 0.18       | $6.98 \times 10^7$    | NM   |                 |

**Table S9** The adsorption energy ( $E_{ad}$ ), the charge transferred from the monolayer to molecule ( $\Delta Q$ ), the shortest distance between the molecule and monolayer ( $D$ ), the band-gap widths ( $E_g$ ), the recovery time ( $\tau$ ), the magnetic order ( $MO$ ) and the magnetic moment on M atoms ( $M$ ) for the structures of the molecules adsorbed on the Ir<sub>2</sub>  $\perp$  gra.

| system           | $E_{ad}$ (eV) | $\Delta Q$ ( $ e $ ) | $D$ ( $\text{\AA}$ ) | $E_g$ (eV) | $\tau$ (s) 300 K      | $MO$ | $M$ ( $\mu_B$ ) |
|------------------|---------------|----------------------|----------------------|------------|-----------------------|------|-----------------|
| O <sub>2</sub>   | -1.88         | -0.82                | 1.91                 | 0.00       | $7.22 \times 10^{18}$ | FM   | +0.15/+0.37     |
| N <sub>2</sub>   | -1.33         | -0.36                | 1.91                 | 0.00       | $3.45 \times 10^9$    | FM   | +0.07/+0.32     |
| CO               | -2.78         | -0.39                | 1.84                 | 0.16       | $1.29 \times 10^{34}$ | NM   |                 |
| CO <sub>2</sub>  | -0.63         | -0.52                | 2.07                 | 0.00       | $4.74 \times 10^{-3}$ | NM   |                 |
| NO               | -3.19         | -0.47                | 1.81                 | 0.00       | $1.14 \times 10^{41}$ | NM   |                 |
| NO <sub>2</sub>  | -2.87         | -0.60                | 2.00                 | 0.00       | $4.32 \times 10^{35}$ | NM   |                 |
| NH <sub>3</sub>  | -1.47         | +0.15                | 2.17                 | 0.00       | $8.14 \times 10^{11}$ | FM   | +0.22/+0.52     |
| H <sub>2</sub> O | -0.76         | +0.07                | 2.20                 | 0.00       | $7.51 \times 10^{-1}$ | FM   | +0.28/+0.54     |
| H <sub>2</sub> S | -1.43         | +0.06                | 2.28                 | 0.00       | $1.71 \times 10^{11}$ | FM   | +0.15/+0.48     |
| SO <sub>2</sub>  | -1.50         | -2.30                | 2.20                 | 0.00       | $2.63 \times 10^{12}$ | FM   | +0.16/+0.43     |

**Table S10** The adsorption energy ( $E_{ad}$ ), the charge transferred from the monolayer to molecule ( $\Delta Q$ ), the shortest distance between the molecule and monolayer ( $D$ ), the band-gap widths ( $E_g$ ), the recovery time ( $\tau$ ), the magnetic order ( $MO$ ) and the magnetic moment on M atoms ( $M$ ) for the structures of the molecules adsorbed on the  $\text{Pt}_2 \perp \text{gra}$ .

| system           | $E_{ad}$ (eV) | $\Delta Q$ ( $ e $ ) | $D$ ( $\text{\AA}$ ) | $E_g$ (eV) | $\tau$ (s) 300 K       | $MO$ | $M$ ( $\mu_B$ ) |
|------------------|---------------|----------------------|----------------------|------------|------------------------|------|-----------------|
| O <sub>2</sub>   | -0.91         | -0.54                | 2.17                 | 0.00       | $2.64 \times 10^2$     | FM   | +0.04/+0.03     |
| N <sub>2</sub>   | -0.53         | -0.17                | 2.02                 | 0.07       | $9.58 \times 10^{-5}$  | NM   |                 |
| CO               | -1.62         | -0.20                | 1.91                 | 0.04       | $2.84 \times 10^{14}$  | NM   |                 |
| CO <sub>2</sub>  | -0.06         | -0.25                | 2.20                 | 0.00       | $1.04 \times 10^{-12}$ | NM   |                 |
| NO               | -1.91         | -0.37                | 1.85                 | 0.06       | $2.33 \times 10^{19}$  | AFM  | -0.03/+0.09     |
| NO <sub>2</sub>  | -1.88         | -0.58                | 2.14                 | 0.00       | $7.22 \times 10^{18}$  | FM   | +0.02/+0.03     |
| NH <sub>3</sub>  | -1.15         | +0.17                | 2.24                 | 0.21       | $3.08 \times 10^6$     | NM   |                 |
| H <sub>2</sub> O | -0.54         | +0.07                | 2.40                 | 0.22       | $1.40 \times 10^{-4}$  | NM   |                 |
| H <sub>2</sub> S | -0.60         | +0.05                | 2.33                 | 0.16       | $1.47 \times 10^{-3}$  | NM   |                 |
| SO <sub>2</sub>  | -0.97         | -2.26                | 2.29                 | 0.01       | $2.74 \times 10^3$     | NM   |                 |

**Table S11** The adsorption energy ( $E_{ad}$ ), the shortest distance between the molecule and monolayer ( $D$ ), the band-gap widths ( $E_g$ ) and the magnetic moment on M atoms ( $M$ ) for the structures of the O<sub>2</sub>/CO<sub>2</sub> (gas) and O<sub>2</sub>+H<sub>2</sub>O/CO<sub>2</sub>+H<sub>2</sub>O (mol+H<sub>2</sub>O) adsorbed on the Ni<sub>2</sub>  $\perp$  gra/Pt<sub>2</sub>  $\perp$  gra.

| system                | $E_{ad}$ (eV) |                      | $D$ ( $\text{\AA}$ ) |                      | $E_g$ (eV) |                      | $M$ ( $\mu_B$ ) |                      |
|-----------------------|---------------|----------------------|----------------------|----------------------|------------|----------------------|-----------------|----------------------|
|                       | gas           | gas+H <sub>2</sub> O | gas                  | gas+H <sub>2</sub> O | gas        | gas+H <sub>2</sub> O | gas             | gas+H <sub>2</sub> O |
| Ni (O <sub>2</sub> )  | -1.30         | -1.30                | 1.93                 | 1.97                 | 0.00       | 0.00                 | +0.14/+0.06     | +0.10/+0.02          |
| Pt (CO <sub>2</sub> ) | -0.06         | -0.04                | 2.20                 | 2.43                 | 0.00       | 0.16                 | 0.00/0.00       | 0.00/0.00            |

**Table S12** The adsorption energy ( $E_{ad}$ ) and the recovery time ( $\tau$ ) for the structures of the O<sub>2</sub> adsorbed on the Ni<sub>2</sub>  $\perp$  gra and the CO<sub>2</sub> adsorbed on the Pt<sub>2</sub>  $\perp$  gra.

| system                | $E_{ad}$ (eV) |       | $D$ ( $\text{\AA}$ ) |       | $\tau$ (s) 300K        |                        |
|-----------------------|---------------|-------|----------------------|-------|------------------------|------------------------|
|                       | DFT           | DFT+U | DFT                  | DFT+U | DFT                    | DFT+U                  |
| Ni (O <sub>2</sub> )  | -1.30         | -1.16 | 1.93                 | 1.93  | $1.07 \times 10^9$     | $4.54 \times 10^9$     |
| Pt (CO <sub>2</sub> ) | -0.06         | -0.04 | 2.20                 | 2.24  | $1.04 \times 10^{-12}$ | $4.76 \times 10^{-13}$ |

**Table S13** The adsorption energy ( $E_{ad}$ ), the shortest distance between the molecule and monolayer ( $D$ ), the charge on the metal atom M ( $Q$ ) and the magnetic moment on M atoms ( $M$ ) for the structures of the molecules adsorbed on the  $Rh_2 \perp gra$  and  $Rh_1 @ gra$ .

| system           | $E_{ad}$ (eV)   |                 | $D$ (Å)         |                 | $Q$ ( $ e $ )   |                 | $M$ ( $\mu_B$ ) |                 |
|------------------|-----------------|-----------------|-----------------|-----------------|-----------------|-----------------|-----------------|-----------------|
|                  | Rh <sub>2</sub> | Rh <sub>1</sub> |
| O <sub>2</sub>   | -1.48           | -1.30           | 1.95            | 2.13            | +0.63/+0.37     | +0.80           | 0.01/0.01       | 0.05            |
| N <sub>2</sub>   | -0.92           | -0.37           | 2.00            | 2.20            | +0.49/+0.42     | +0.57           | 0               | 0.09            |
| CO               | -1.78           | -0.99           | 1.79            | 2.04            | +0.43/+0.40     | +0.57           | 0               | 0.05            |
| CO <sub>2</sub>  | -0.38           | -0.13           | 2.02            | 2.20            | +0.47/+0.35     | +0.56           | 0               | 0               |
| NO               | -2.65           | -1.77           | 1.74            | 1.98            | +0.58/+0.37     | +0.67           | 0               | 0               |
| NO <sub>2</sub>  | -2.57           | -2.30           | 1.94            | 2.13            | +0.61/+0.38     | +0.69           | 0               | 0               |
| NH <sub>3</sub>  | -1.30           | -0.80           | 2.05            | 2.32            | +0.42/+0.35     | +0.52           | 0               | 0.18            |
| H <sub>2</sub> O | -0.70           | -0.42           | 2.04            | 2.37            | +0.46/+0.35     | +0.56           | 0               | 0.20            |
| H <sub>2</sub> S | -1.13           | -0.59           | 2.25            | 2.46            | +0.34/+0.36     | +0.47           | 0               | 0.16            |
| SO <sub>2</sub>  | -1.23           | -0.86           | 2.20            | 2.55            | +0.37/+0.39     | +0.54           | 0               | 0.02            |

**Table S14** The d-band centers ( $C_{d-band}$ , in eV) of  $M_2 \perp gra$  and  $M_1 @ gra$

| system                      | $C_{d-band}$ | system                | $C_{d-band}$ |
|-----------------------------|--------------|-----------------------|--------------|
| Co <sub>2</sub> $\perp$ gra | -0.93        | Co <sub>1</sub> @ gra | -1.78        |
| Ni <sub>2</sub> $\perp$ gra | -2.09        | Ni <sub>1</sub> @ gra | -3.25        |
| Rh <sub>2</sub> $\perp$ gra | -1.33        | Rh <sub>1</sub> @ gra | -2.48        |
| Ir <sub>2</sub> $\perp$ gra | -1.27        | Ir <sub>1</sub> @ gra | -2.94        |
| Pt <sub>2</sub> $\perp$ gra | -3.20        | Pt <sub>1</sub> @ gra | -4.20        |

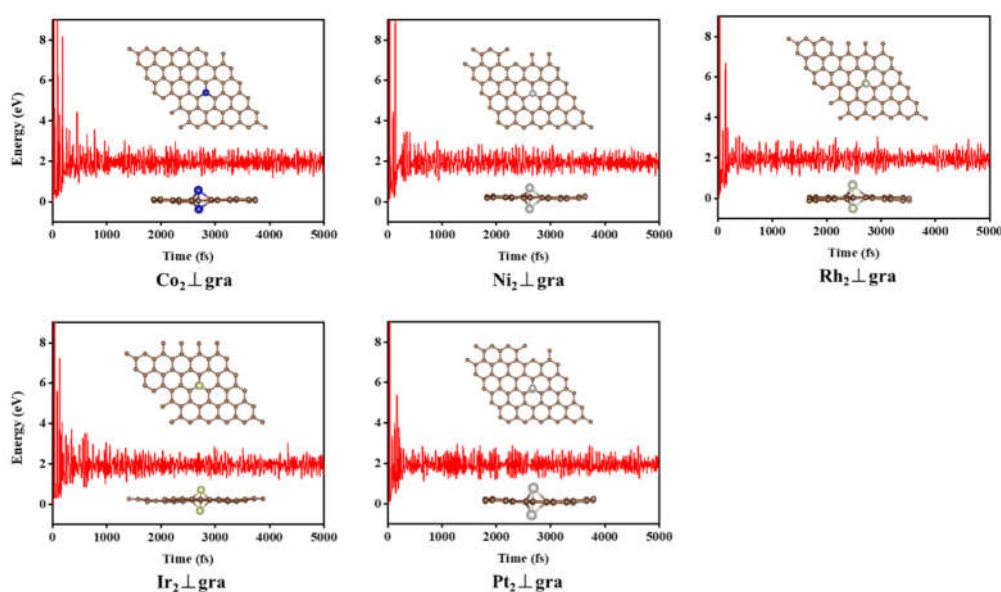

**Fig. S1** The energy evolution of five  $M_2 \perp gra$  ( $M = Co, Ni, Rh, Ir$  and  $Pt$ ) monolayers during 5 ps FPMD simulation at 300 K, the insets are the final annealed structures.

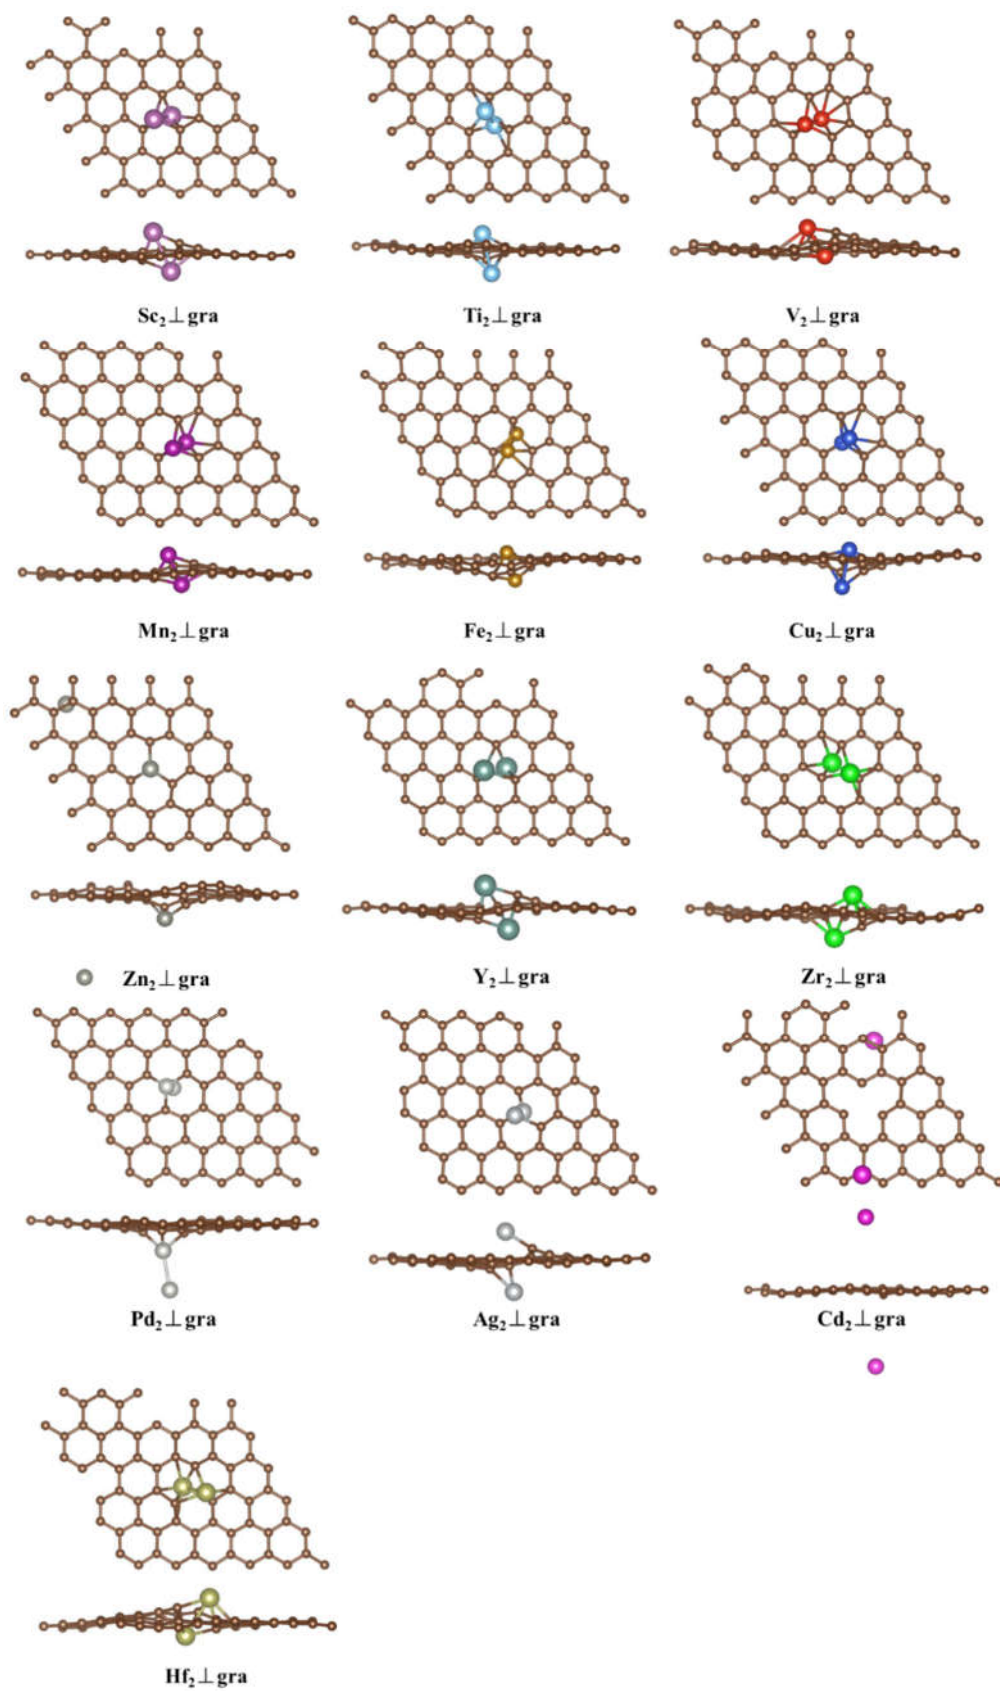

**Fig. S2** The final structures of thirteen  $\text{M}_2 \perp \text{gra}$  ( $\text{M} = \text{Sc}, \text{Ti}, \text{V}, \text{Mn}, \text{Fe}, \text{Cu}, \text{Zn}, \text{Y}, \text{Zr}, \text{Pd}, \text{Ag}, \text{Cd}$  and  $\text{Hf}$ ) monolayers annealed for 5 ps at 300 K.

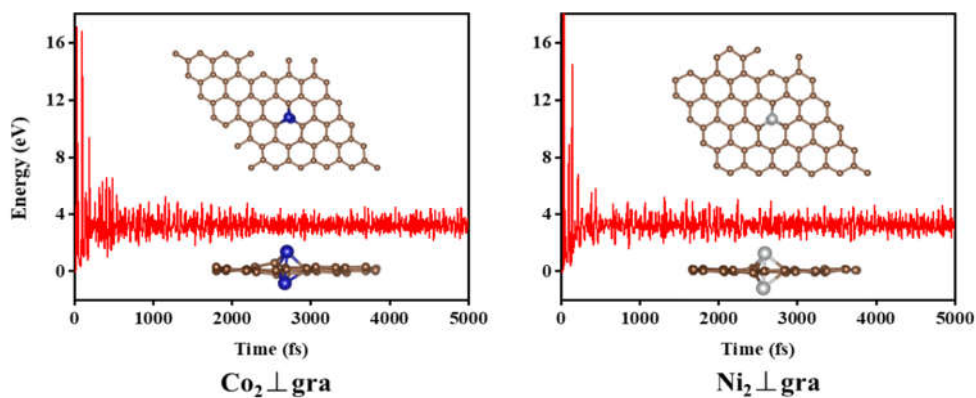

**Fig. S3** The energy evolution of  $\text{Co}_2 \perp \text{gra}$  (left) and  $\text{Ni}_2 \perp \text{gra}$  (right) monolayers during 5 ps FPMD simulation at 500 K, the insets are the final annealed structures.

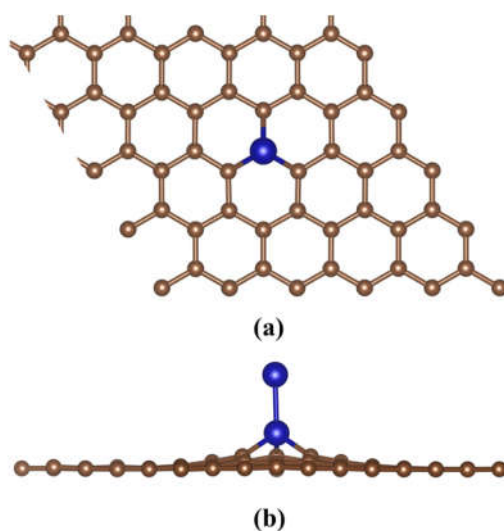

**Fig. S4** Structural diagram of the  $\text{M}_2\text{-gra}$  model, top view (a) and side view (b). Color scheme: C, brown; M, blue.

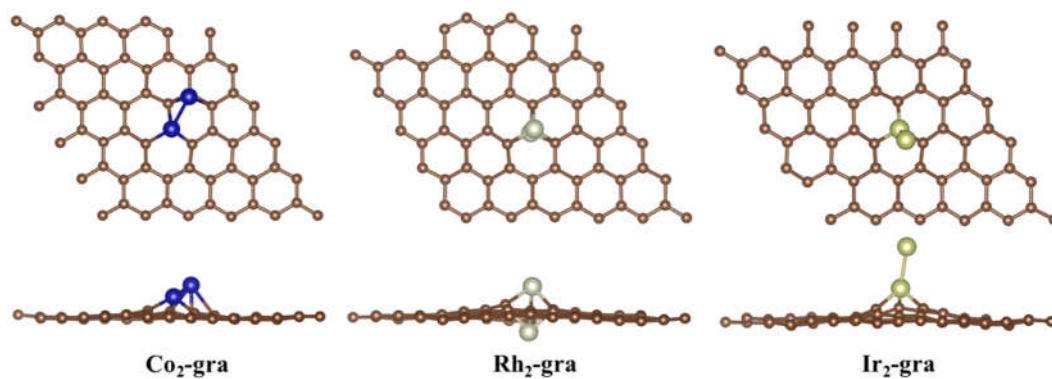

**Fig. S5** The final structures of  $\text{Co}_2\text{-gra}$ ,  $\text{Rh}_2\text{-gra}$  and  $\text{Ir}_2\text{-gra}$  monolayers annealed for 5 ps at 300 K.



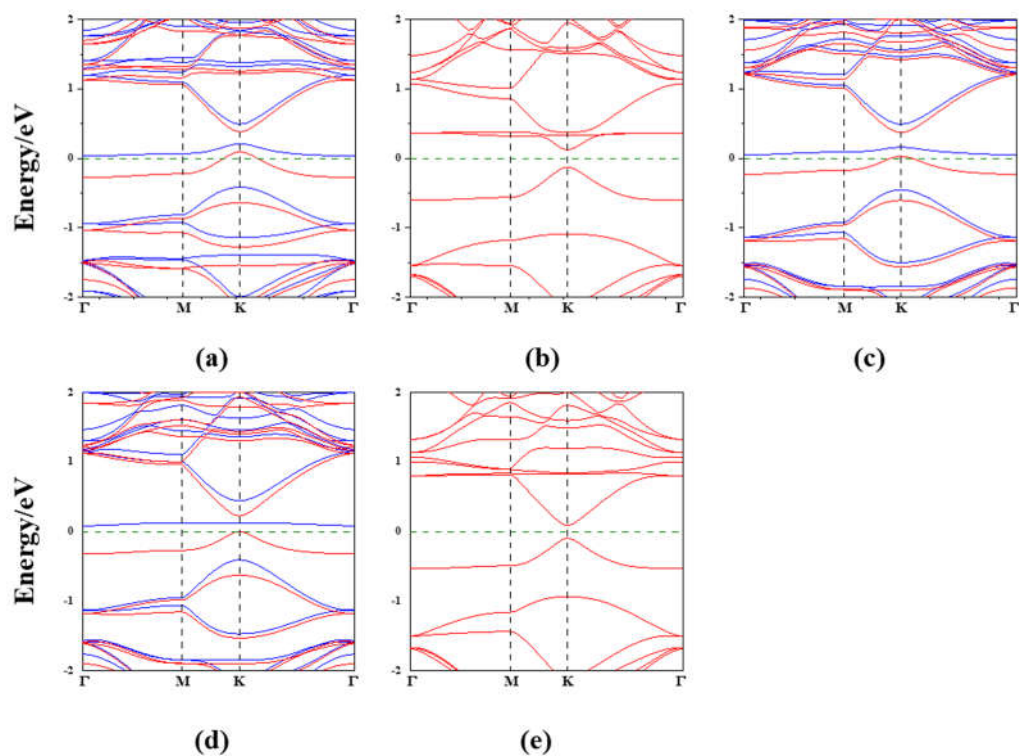

**Fig. S6** The band structures of the five  $M_1@gra$  structures:  $Co_1@gra$  (a),  $Ni_1@gra$  (b),  $Rh_1@gra$  (c),  $Ir_1@gra$  (d) and  $Pt_1@gra$  (e).

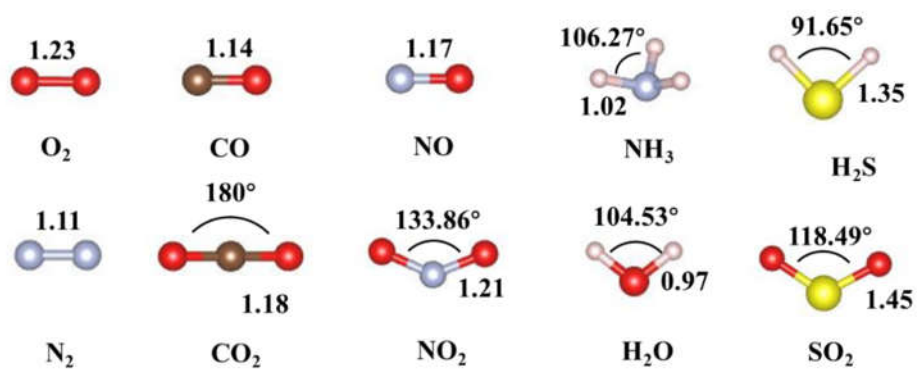

**Fig. S7** The optimized structures of free gas molecules.

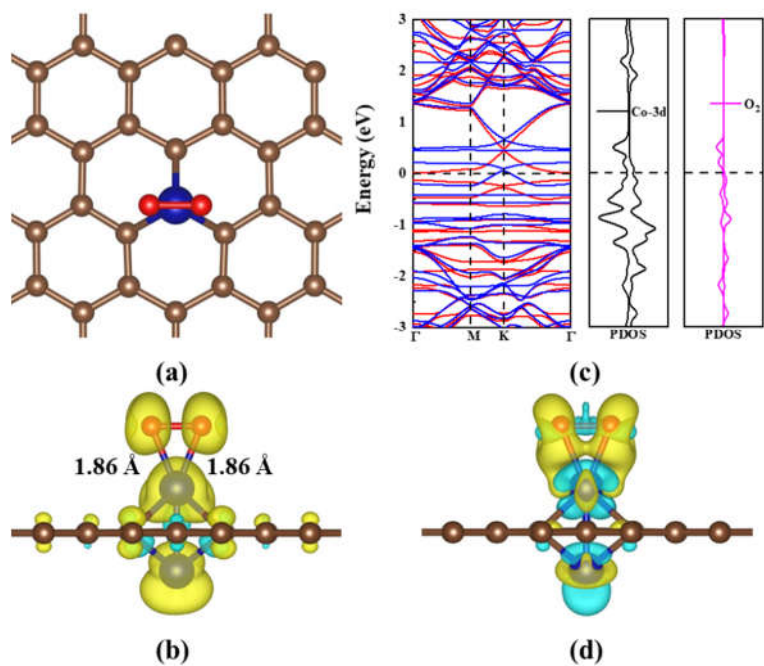

**Fig. S8** The most favorable configuration of O<sub>2</sub> adsorption energy on the Co<sub>2</sub>⊥ gra structure (top view (a)), spatial spin density distribution (b), energy band structure and PDOS (c), and CDD diagram (d) of the adsorbed system. The isosurface value was set 0.003 e/Å<sup>-3</sup>.

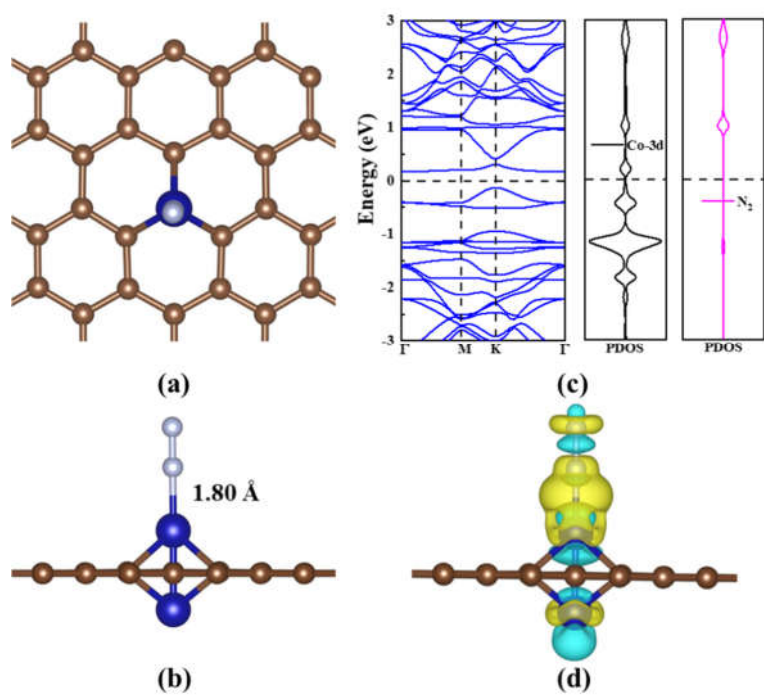

**Fig. S9** The most favorable configuration of N<sub>2</sub> adsorption energy on the Co<sub>2</sub>⊥ gra structure (top view (a) and side view (b)), energy band structure and PDOS (c), and CDD diagram (d). The isosurface value was set 0.003 e/Å<sup>-3</sup>.

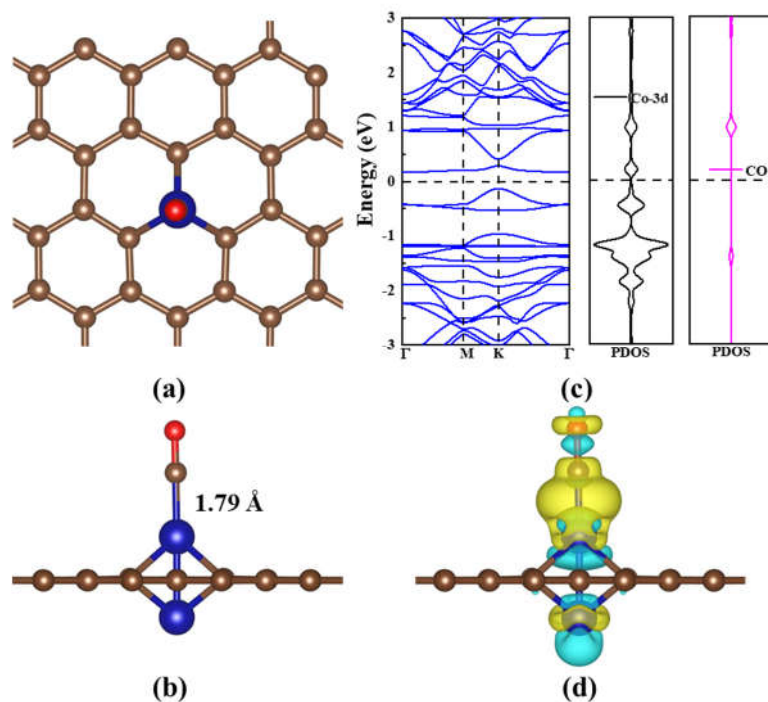

**Fig. S10** The most favorable configuration of CO adsorption energy on the  $\text{Co}_2\perp$  gra structure (top view (a) and side view (b)), energy band structure and PDOS (c), and CDD diagram (d). The isosurface value was set  $0.003 \text{ e}/\text{\AA}^{-3}$ .

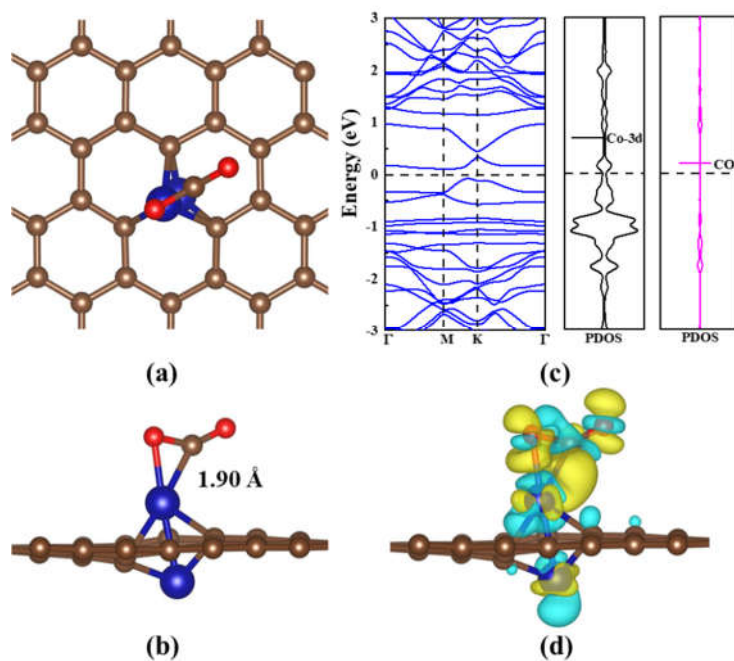

**Fig. S11** The most favorable configuration of  $\text{CO}_2$  adsorption energy on the  $\text{Co}_2\perp$  gra structure (top view (a) and side view (b)), energy band structure and PDOS (c), and CDD diagram (d). The isosurface value was set  $0.003 \text{ e}/\text{\AA}^{-3}$ .

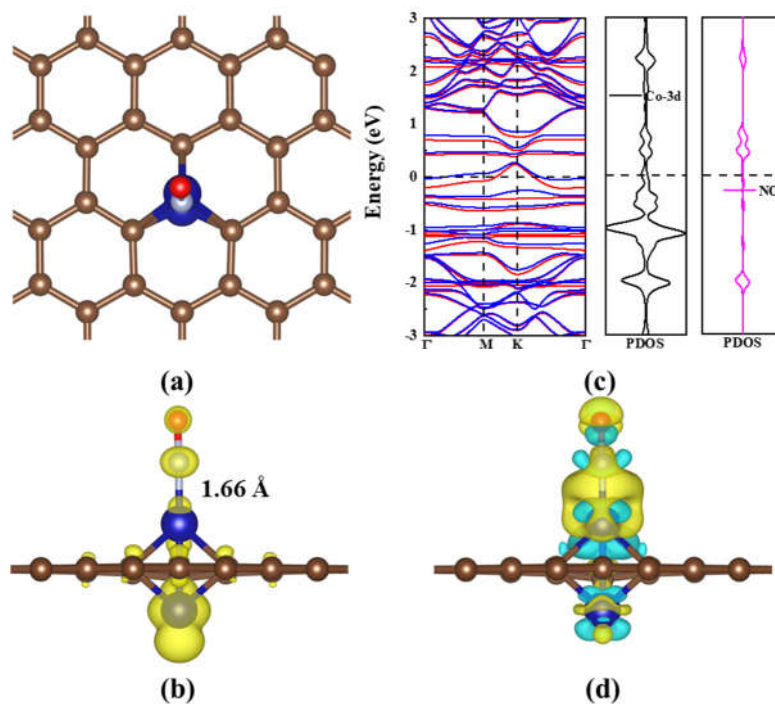

**Fig. S12** The most favorable configuration of NO adsorption energy on the Co<sub>2</sub>⊥ gra structure (top view (a)), spatial spin density distributions (b), energy band structure and PDOS (c), and CDD diagram (d). The isosurface value was set  $0.003 \text{ e}/\text{\AA}^{-3}$ .

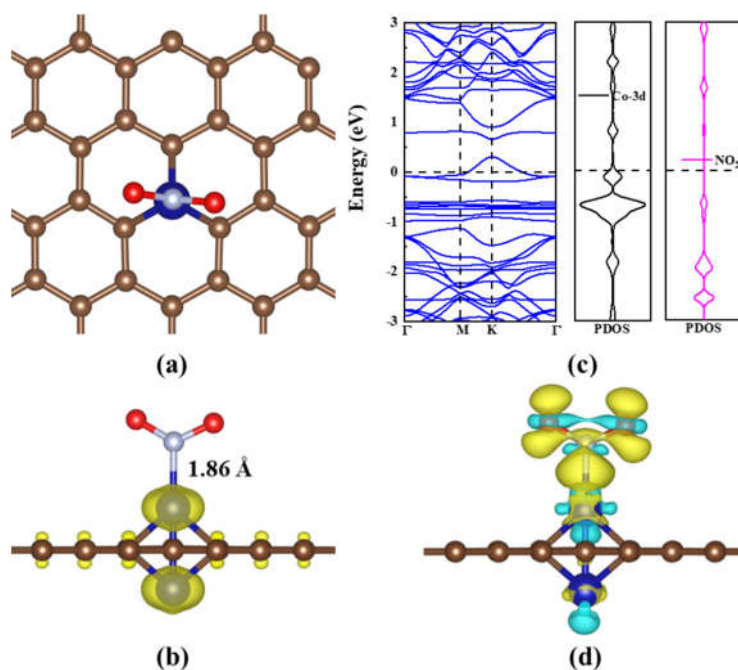

**Fig. S13** The most favorable configuration of NO<sub>2</sub> adsorption energy on the Co<sub>2</sub>⊥ gra structure (top view (a)), spatial spin density distributions (b), energy band structure and PDOS (c), and CDD diagram (d). The isosurface value was set  $0.0008 \text{ e}/\text{\AA}^{-3}$  for spatial spin density distributions and  $0.003 \text{ e}/\text{\AA}^{-3}$  for CDD, respectively.

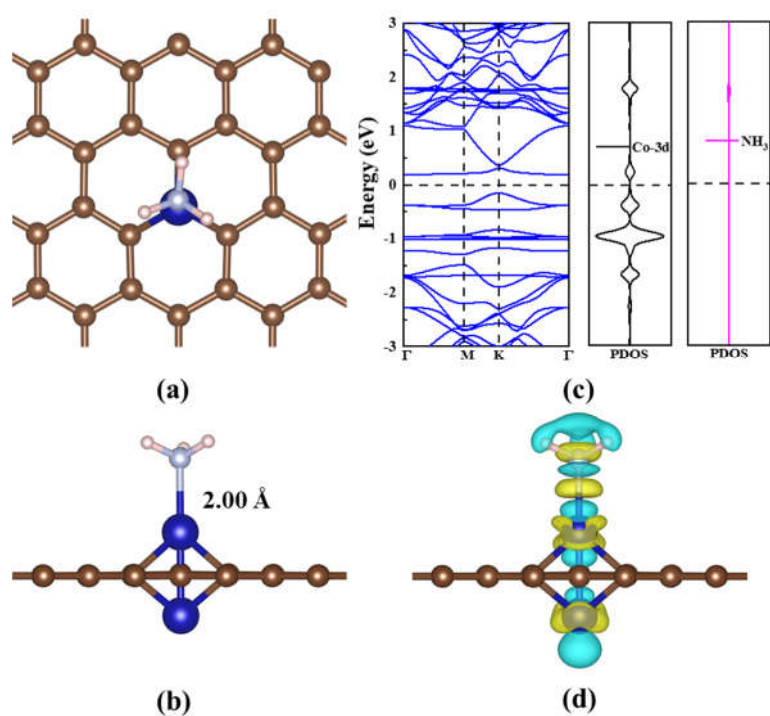

**Fig. S14** The most favorable configuration of NH<sub>3</sub> adsorption energy on the Co<sub>2</sub>L gra structure (top view (a) and side view (b)), energy band structure and PDOS (c), and CDD diagram (d). The isosurface value was set  $0.003 \text{ e}/\text{\AA}^{-3}$ .

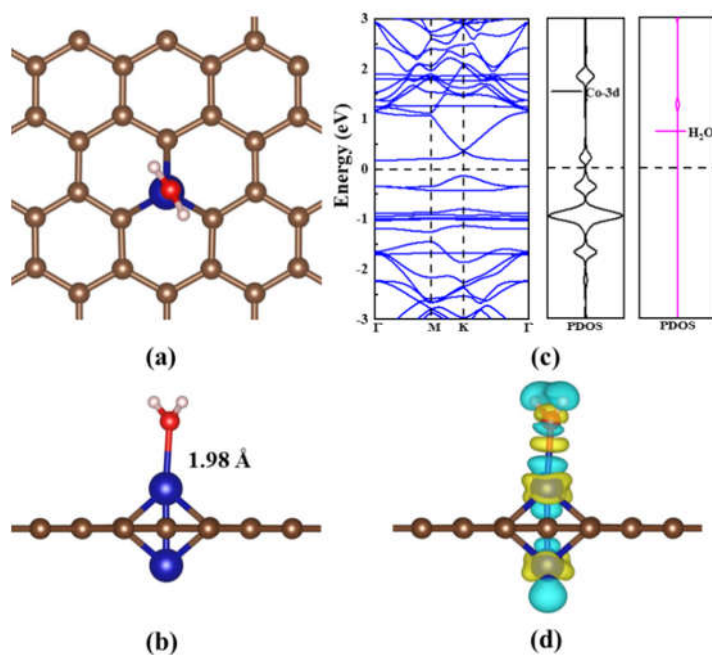

**Fig. S15** The most favorable configuration of H<sub>2</sub>O adsorption energy on the Co<sub>2</sub>L gra structure (top view (a) and side view (b)), energy band structure and PDOS (c), and CDD diagram (d). The isosurface value was set  $0.003 \text{ e}/\text{\AA}^{-3}$ .

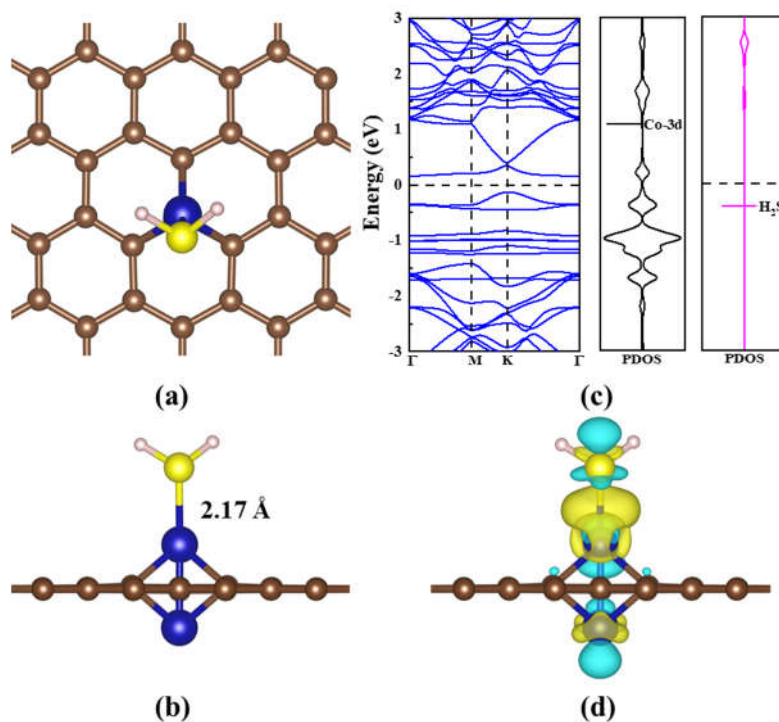

**Fig. S16** The most favorable configuration of H<sub>2</sub>S adsorption energy on the Co<sub>2</sub>⊥ gra structure (top view (a) and side view (b)), energy band structure and PDOS (c), and CDD diagram (d). The isosurface value was set  $0.003 \text{ e}/\text{\AA}^{-3}$ .

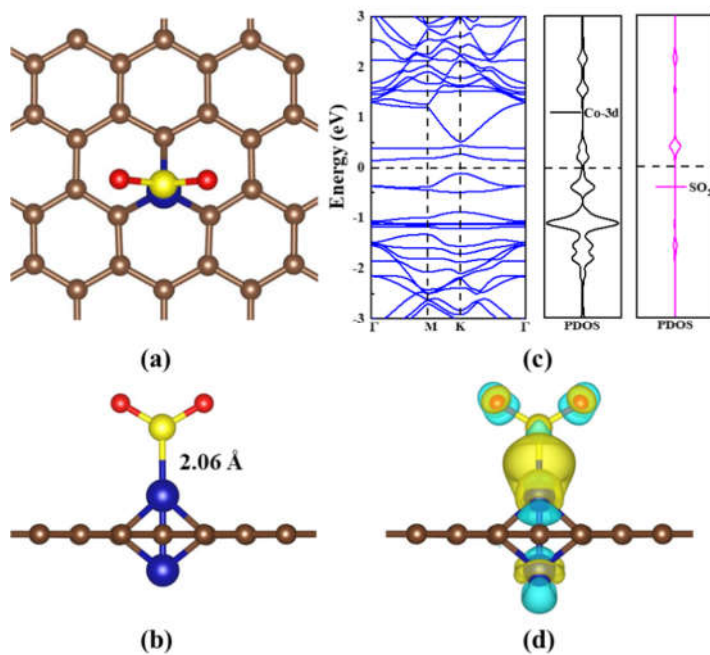

**Fig. S17** The most favorable configuration of SO<sub>2</sub> adsorption energy on the Co<sub>2</sub>⊥ gra structure (top view (a) and side view (b)), energy band structure and PDOS (c), and CDD diagram (d). The isosurface value was set  $0.003 \text{ e}/\text{\AA}^{-3}$ .

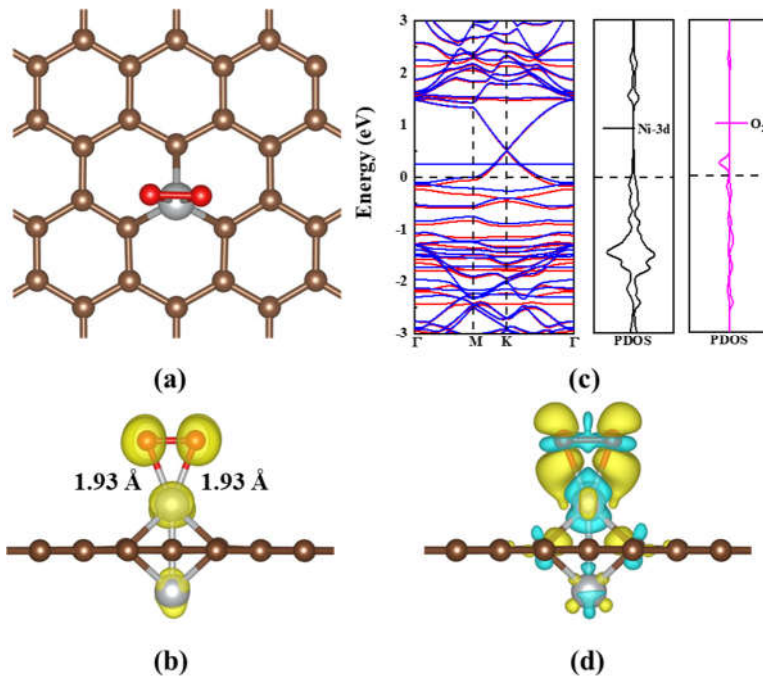

**Fig. S18** The most favorable configuration of O<sub>2</sub> adsorption energy on the Ni<sub>2</sub>L gra structure (top view (a)), spatial spin density distributions (b), energy band structure and PDOS (c), and CDD diagram (d). The isosurface value was set  $0.005 \text{ e}/\text{\AA}^{-3}$  for spatial spin density distributions and  $0.003 \text{ e}/\text{\AA}^{-3}$  for CDD, respectively.

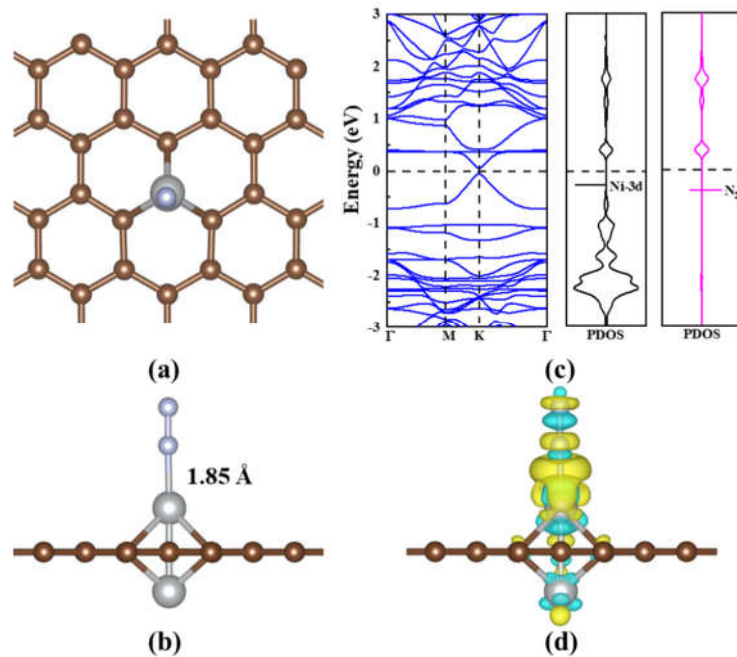

**Fig. S19** The most favorable configuration of N<sub>2</sub> adsorption energy on the Ni<sub>2</sub>L gra structure (top view (a) and side view (b)), energy band structure and PDOS (c), and CDD diagram (d). The isosurface value was set  $0.003 \text{ e}/\text{\AA}^{-3}$ .

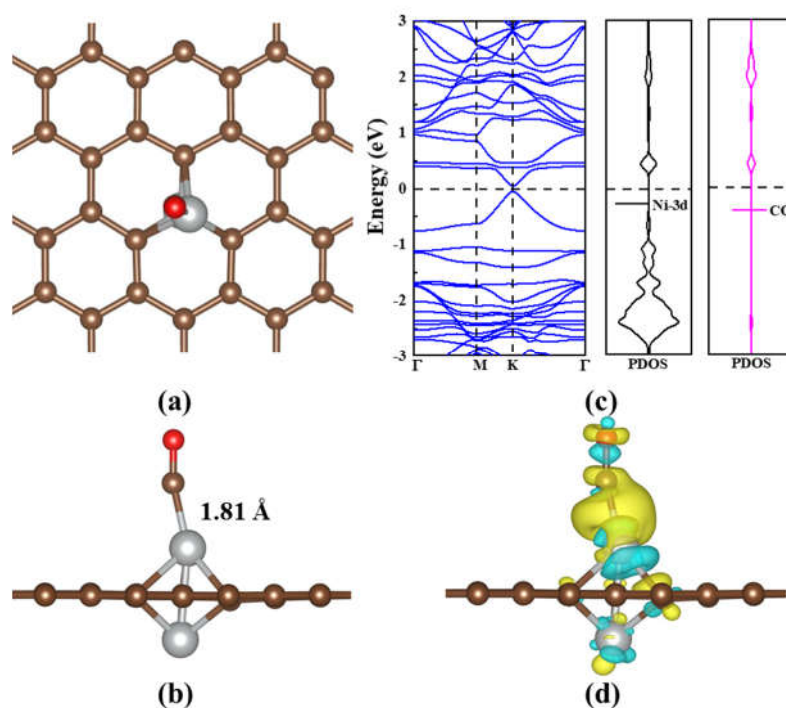

**Fig. S20** The most favorable configuration of CO adsorption energy on the Ni<sub>2</sub>L gra structure (top view (a) and side view (b)), energy band structure and PDOS (c), and CDD diagram (d). The isosurface value was set  $0.003 \text{ e}/\text{\AA}^{-3}$ .

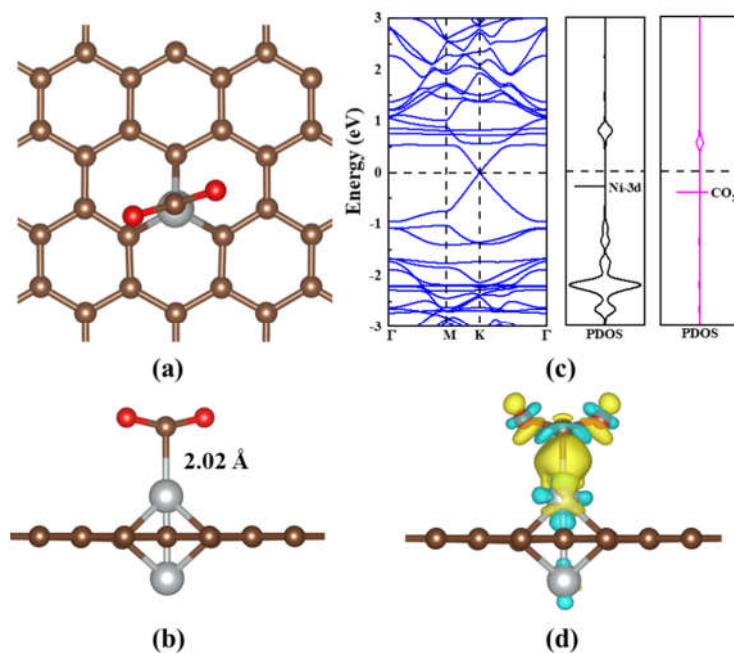

**Fig. S21** The most favorable configuration of CO<sub>2</sub> adsorption energy on the Ni<sub>2</sub>L gra structure (top view (a) and side view (b)), energy band structure and PDOS (c), and CDD diagram (d). The isosurface value was set  $0.003 \text{ e}/\text{\AA}^{-3}$ .



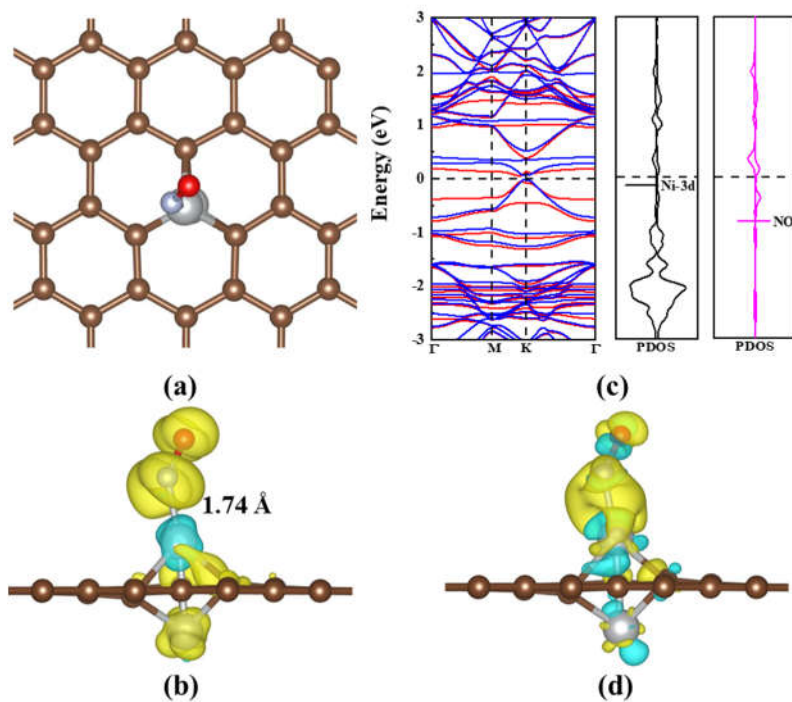

**Fig. S22** The most favorable configuration of NO adsorption energy on the  $\text{Ni}_2\perp$  gra structure (top view (a)), spatial spin density distributions (b), energy band structure and PDOS (c), and CDD diagram (d). The isosurface value was set  $0.003 \text{ e}/\text{\AA}^{-3}$ .

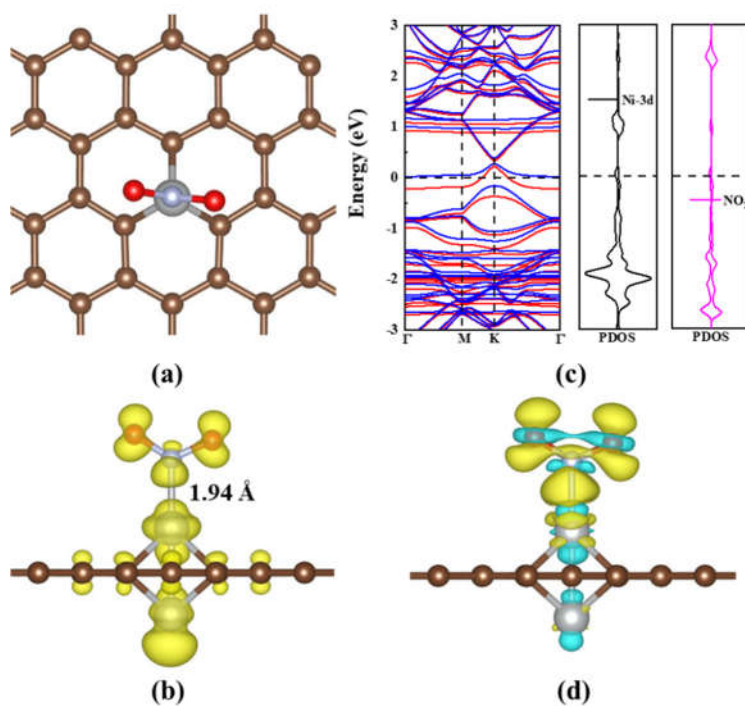

**Fig. S23** The most favorable configuration of  $\text{NO}_2$  adsorption energy on the  $\text{Ni}_2\perp$  gra structure (top view (a)), spatial spin density distributions (b), energy band structure and PDOS (c), and CDD diagram (d). The isosurface value was set  $0.003 \text{ e}/\text{\AA}^{-3}$ .

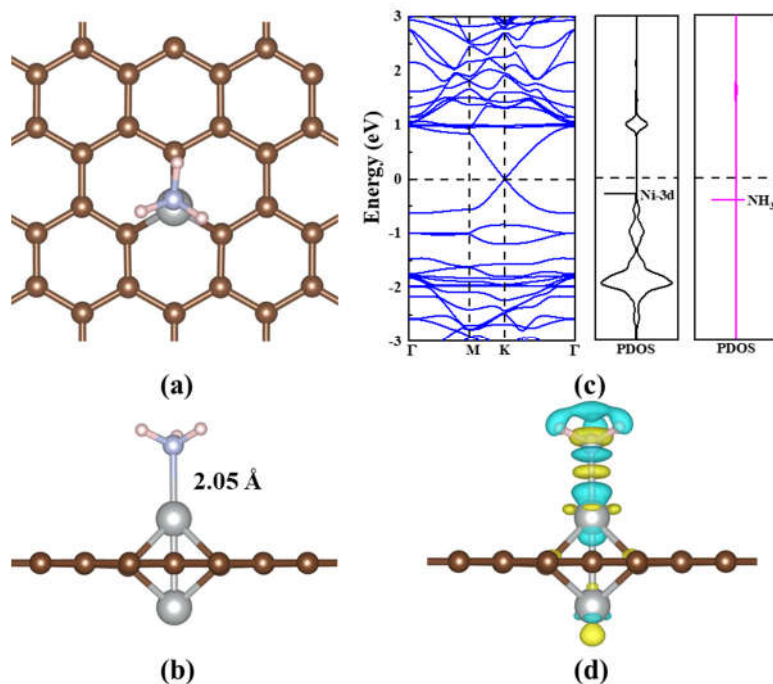

**Fig. S24** The most favorable configuration of NH<sub>3</sub> adsorption energy on the Ni<sub>2</sub>L gra structure (top view (a) and side view (b)), energy band structure and PDOS (c), and CDD diagram (d). The isosurface value was set  $0.003 \text{ e}/\text{\AA}^{-3}$ .

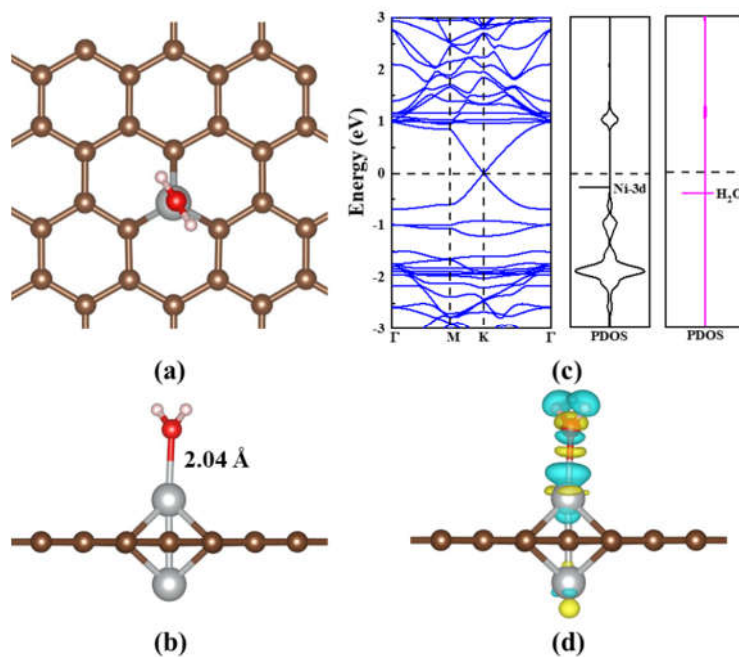

**Fig. S25** The most favorable configuration of H<sub>2</sub>O adsorption energy on the Ni<sub>2</sub>L gra structure (top view (a) and side view (b)), energy band structure and PDOS (c), and CDD diagram (d). The isosurface value was set  $0.003 \text{ e}/\text{\AA}^{-3}$ .

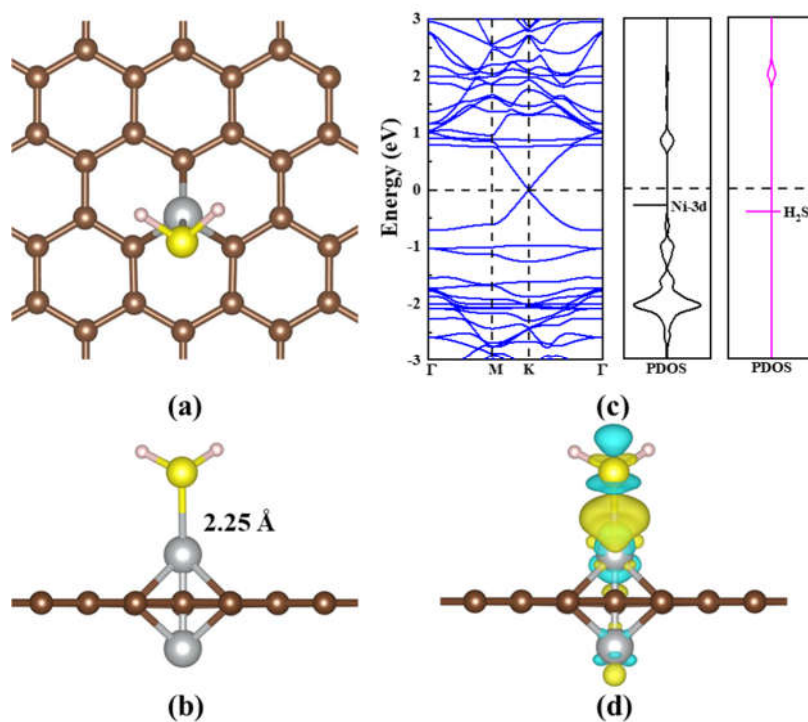

**Fig. S26** The most favorable configuration of H<sub>2</sub>S adsorption energy on the Ni<sub>2</sub>L gra structure (top view (a) and side view (b)), energy band structure and PDOS (c), and CDD diagram (d). The isosurface value was set  $0.003 \text{ e}/\text{\AA}^{-3}$ .

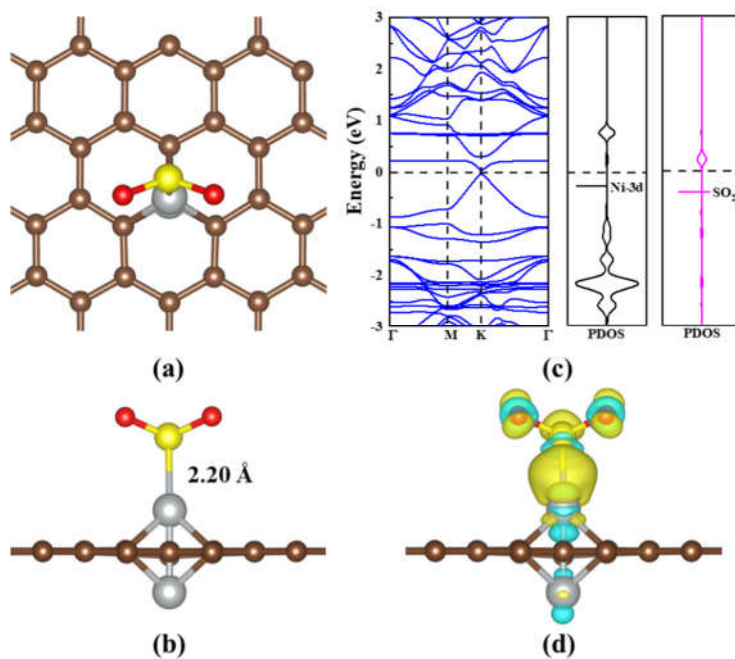

**Fig. S27** The most favorable configuration of SO<sub>2</sub> adsorption energy on the Ni<sub>2</sub>L gra structure (top view (a) and side view (b)), energy band structure and PDOS (c), and CDD diagram (d). The isosurface value was set  $0.003 \text{ e}/\text{\AA}^{-3}$ .

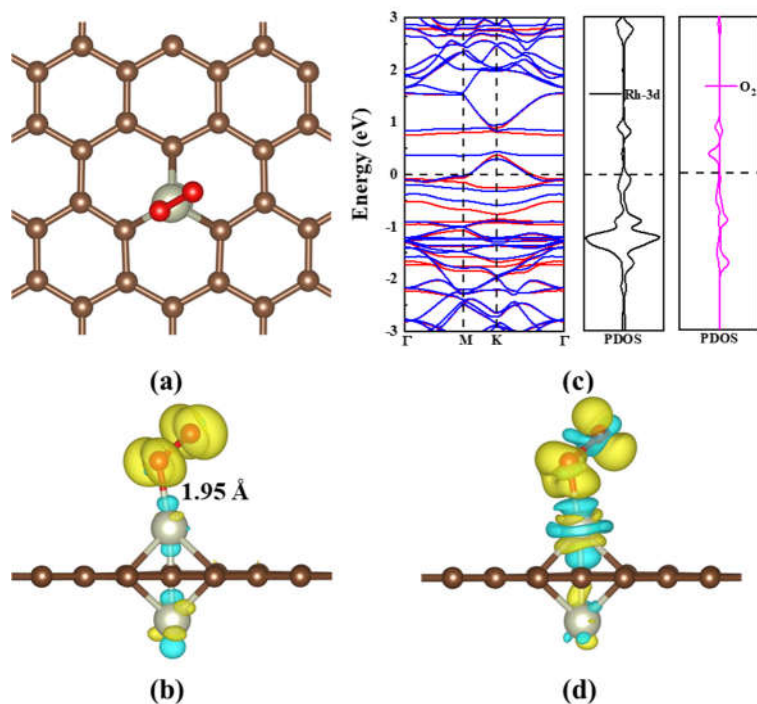

**Fig. S28** The most favorable configuration of O<sub>2</sub> adsorption energy on the Rh<sub>2</sub>L gra structure (top view (a)), spatial spin density distributions (b), energy band structure and PDOS (c), and CDD diagram (d). The isosurface value was set 0.003 e/Å<sup>-3</sup>.

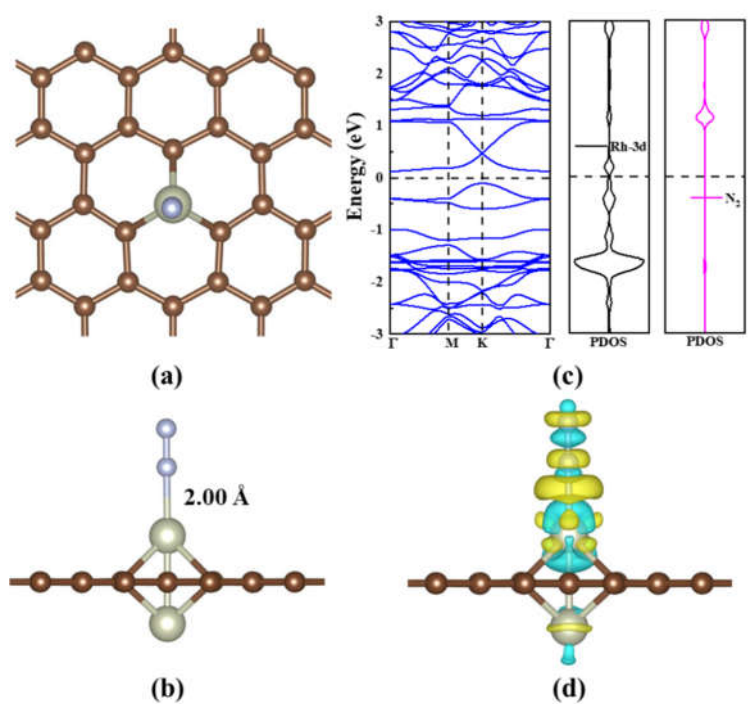

**Fig. S29** The most favorable configuration of N<sub>2</sub> adsorption energy on the Rh<sub>2</sub>L gra structure (top view (a) and side view (b)), energy band structure and PDOS (c), and CDD diagram (d). The isosurface value was set 0.003 e/Å<sup>-3</sup>.

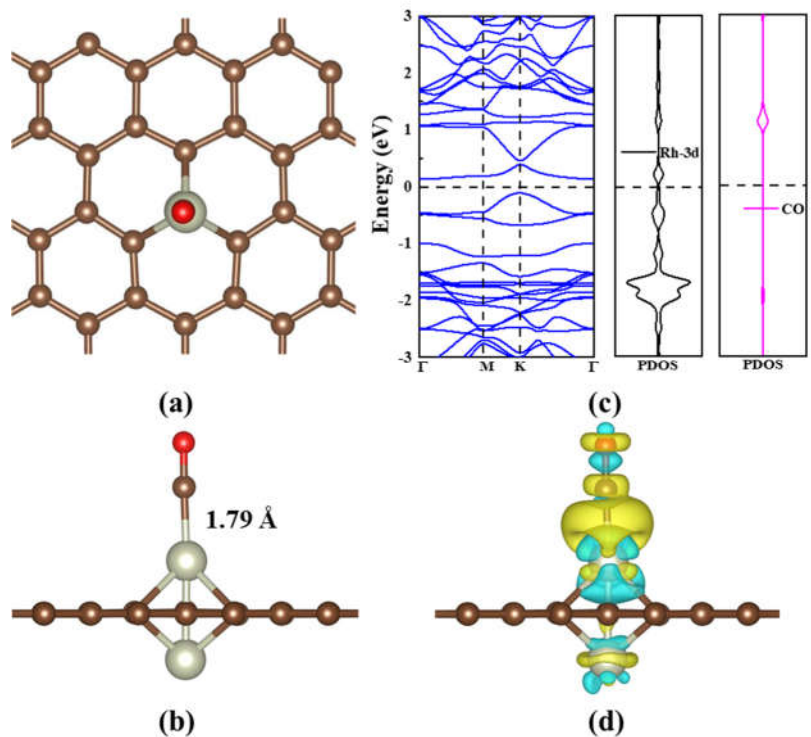

**Fig. S30** The most favorable configuration of CO adsorption energy on the Rh<sub>2</sub>L gra structure (top view (a) and side view (b)), energy band structure and PDOS (c), and CDD diagram (d). The isosurface value was set  $0.003 \text{ e}/\text{\AA}^{-3}$ .

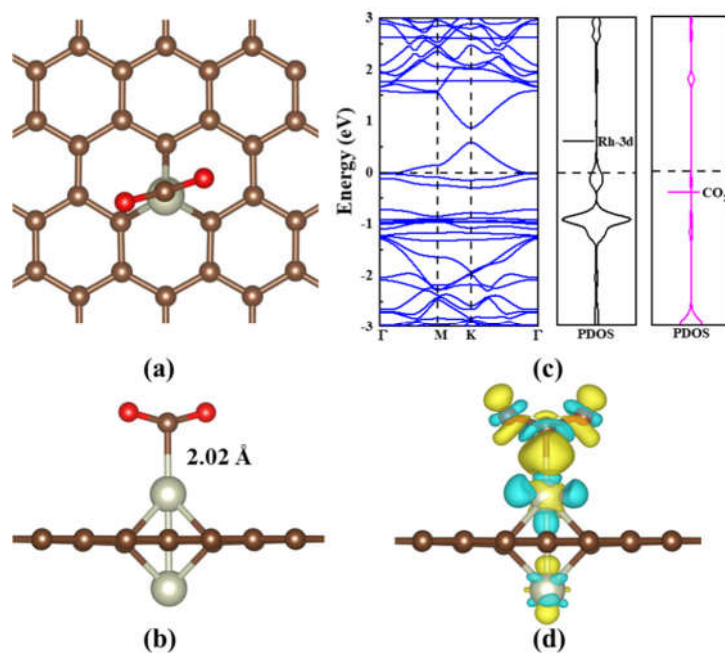

**Fig. S31** The most favorable configuration of CO<sub>2</sub> adsorption energy on the Rh<sub>2</sub>L gra structure (top view (a) and side view (b)), energy band structure and PDOS (c), and CDD diagram (d). The isosurface value was set  $0.003 \text{ e}/\text{\AA}^{-3}$ .

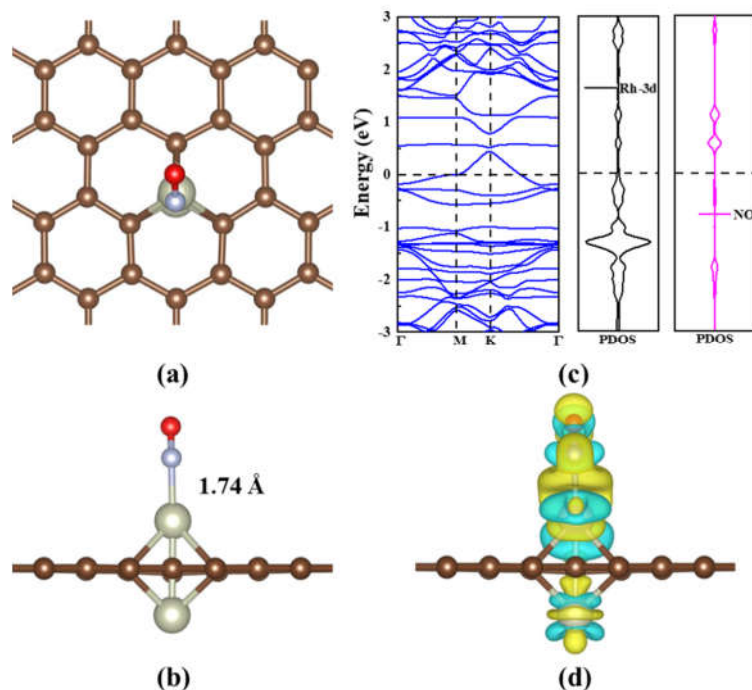

**Fig. S32** The most favorable configuration of NO adsorption energy on the Rh<sub>2</sub>⊥ gra structure (top view (a) and side view (b)), energy band structure and PDOS (c), and CDD diagram (d). The isosurface value was set  $0.003 \text{ e}/\text{\AA}^{-3}$ .

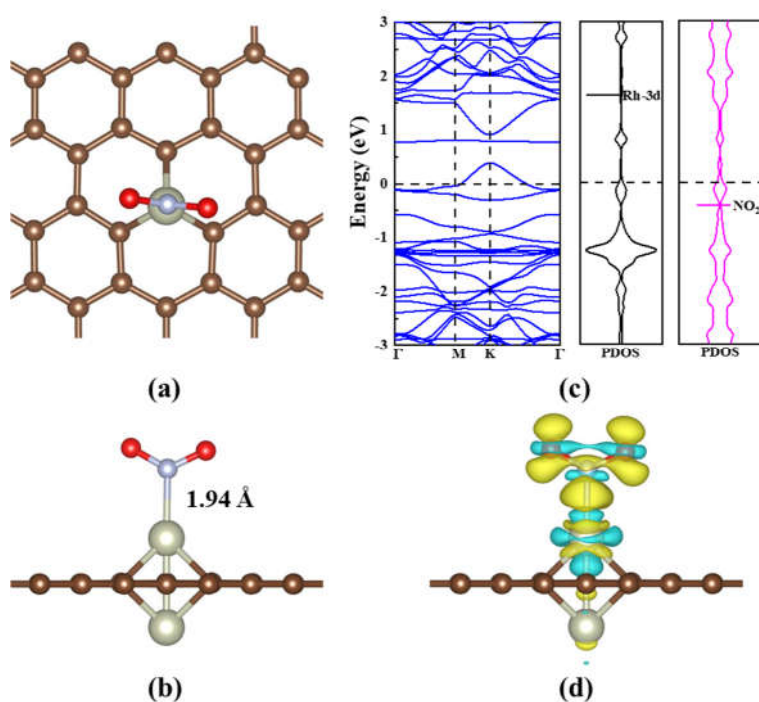

**Fig. S33** The most favorable configuration of NO<sub>2</sub> adsorption energy on the Rh<sub>2</sub>⊥ gra structure (top view (a) and side view (b)), energy band structure and PDOS (c), and CDD diagram (d). The isosurface value was set  $0.003 \text{ e}/\text{\AA}^{-3}$ .

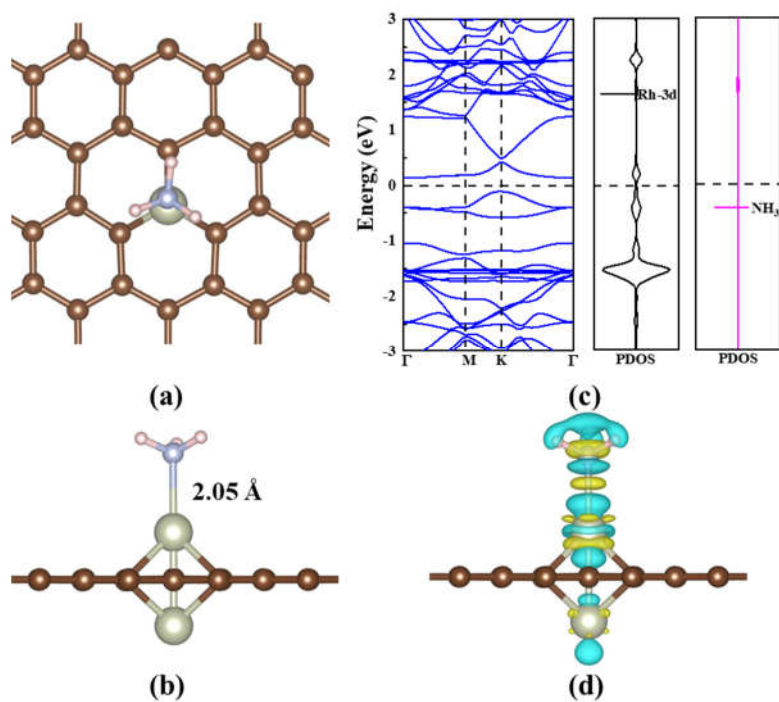

**Fig. S34** The most favorable configuration of NH<sub>3</sub> adsorption energy on the Rh<sub>2</sub>L gra structure (top view (a) and side view (b)), energy band structure and PDOS (c), and CDD diagram (d). The isosurface value was set  $0.003 \text{ e}/\text{\AA}^{-3}$ .

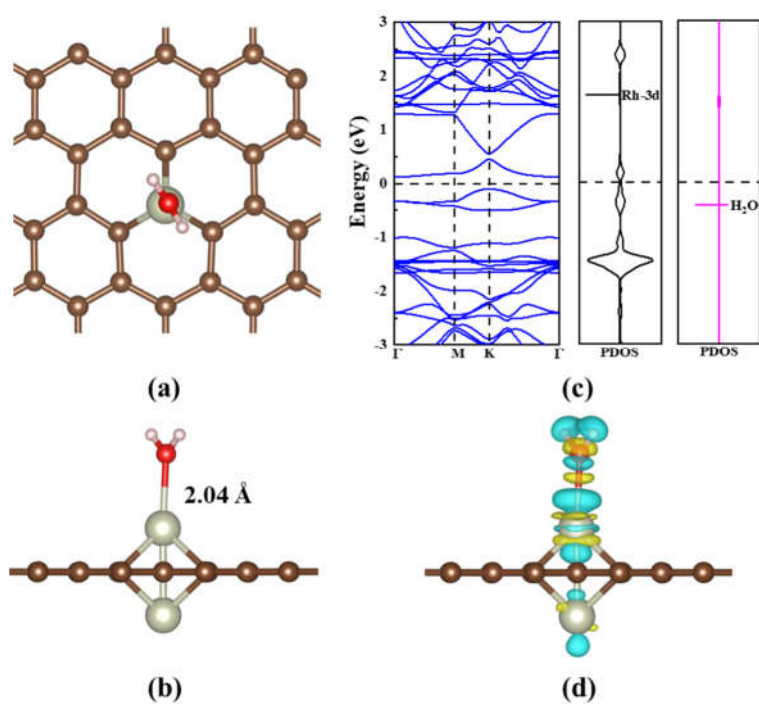

**Fig. S35** The most favorable configuration of H<sub>2</sub>O adsorption energy on the Rh<sub>2</sub>L gra structure (top view (a) and side view (b)), energy band structure and PDOS (c), and CDD diagram (d). The isosurface value was set  $0.003 \text{ e}/\text{\AA}^{-3}$ .

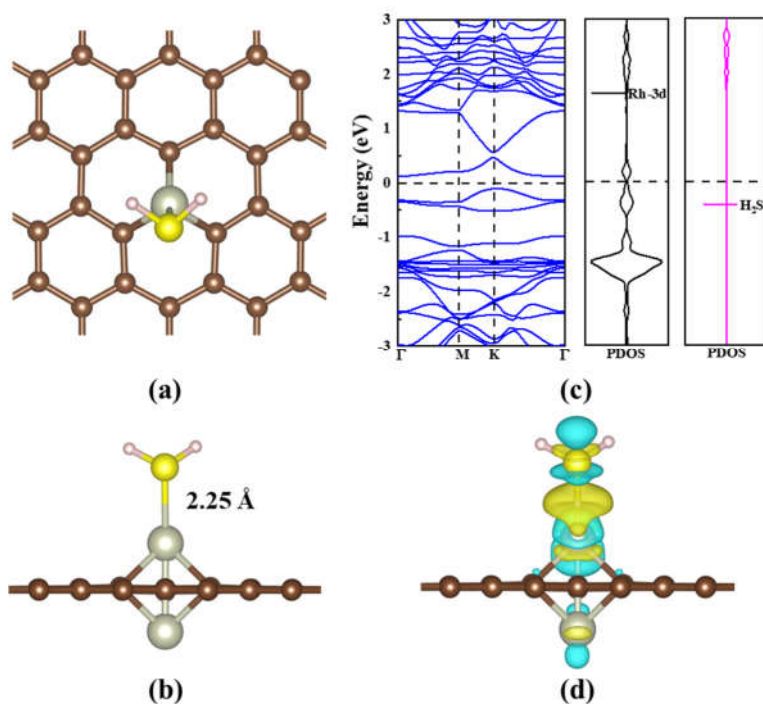

**Fig. S36** The most favorable configuration of H<sub>2</sub>S adsorption energy on the Rh<sub>2</sub>L gra structure (top view (a) and side view (b)), energy band structure and PDOS (c), and CDD diagram (d). The isosurface value was set  $0.003 \text{ e}/\text{\AA}^{-3}$ .

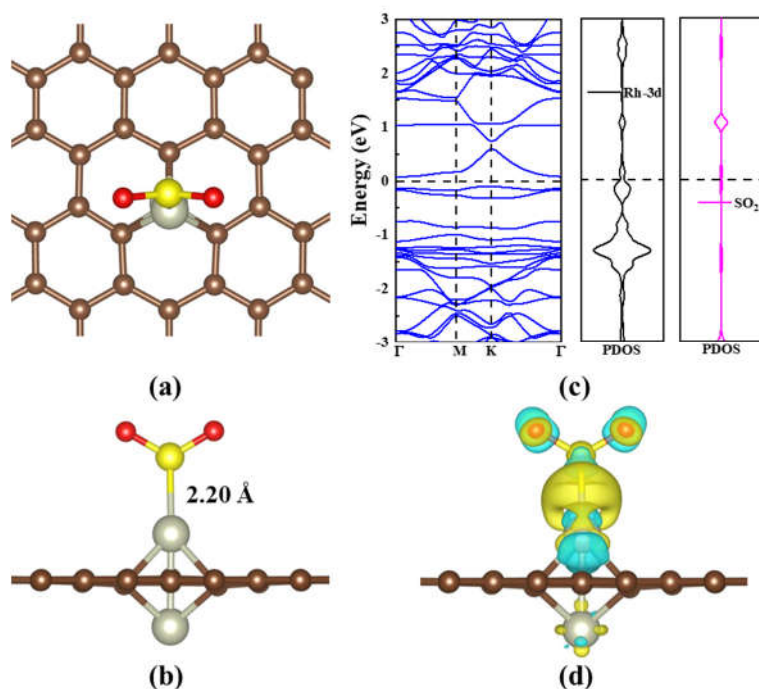

**Fig. S37** The most favorable configuration of SO<sub>2</sub> adsorption energy on the Rh<sub>2</sub>L gra structure (top view (a) and side view (b)), energy band structure and PDOS (c), and CDD diagram (d). The isosurface value was set  $0.003 \text{ e}/\text{\AA}^{-3}$ .



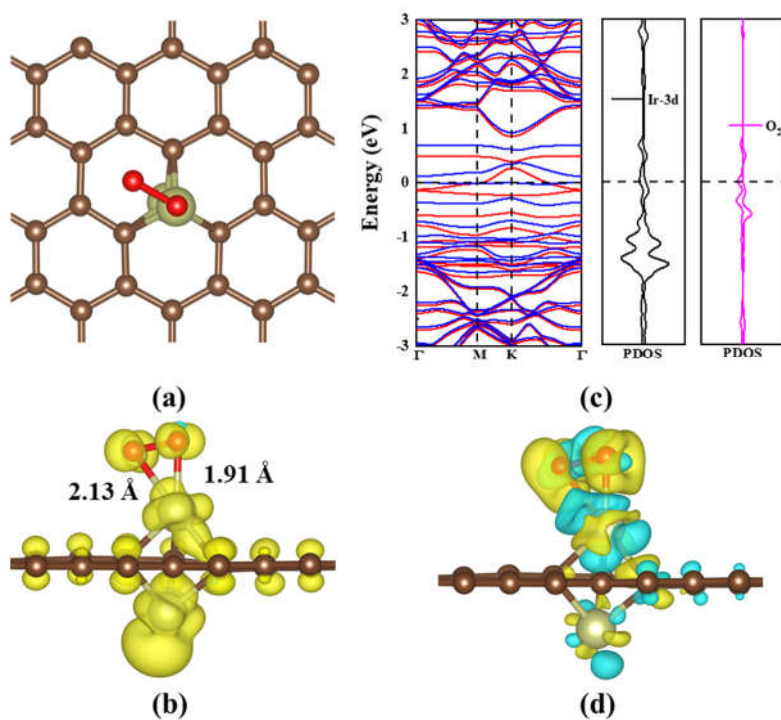

**Fig. S38** The most favorable configuration of O<sub>2</sub> adsorption energy on the Ir<sub>2</sub>L gra structure (top view (a)), spatial spin density distributions (b), energy band structure and PDOS (c), and CDD diagram (d). The isosurface value was set 0.003 e/Å<sup>-3</sup>.

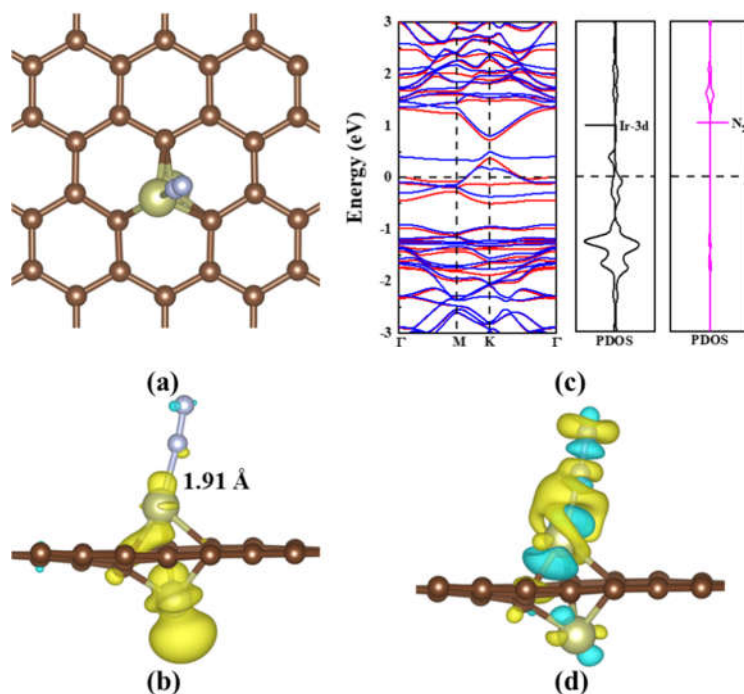

**Fig. S39** The most favorable configuration of N<sub>2</sub> adsorption energy on the Ir<sub>2</sub>L gra structure (top view (a)), spatial spin density distributions (b), energy band structure and PDOS (c), and CDD diagram (d). The isosurface value was set 0.003 e/Å<sup>-3</sup>.

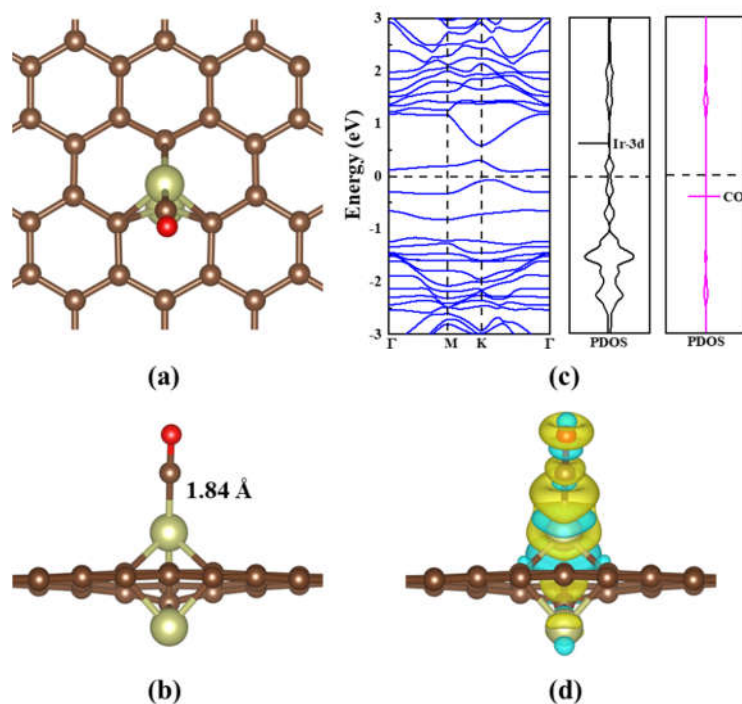

**Fig. S40** The most favorable configuration of CO adsorption energy on the Ir<sub>2</sub>⊥ gra structure (top view (a) and side view (b)), energy band structure and PDOS (c), and CDD diagram (d). The isosurface value was set  $0.003 \text{ e}/\text{\AA}^{-3}$ .

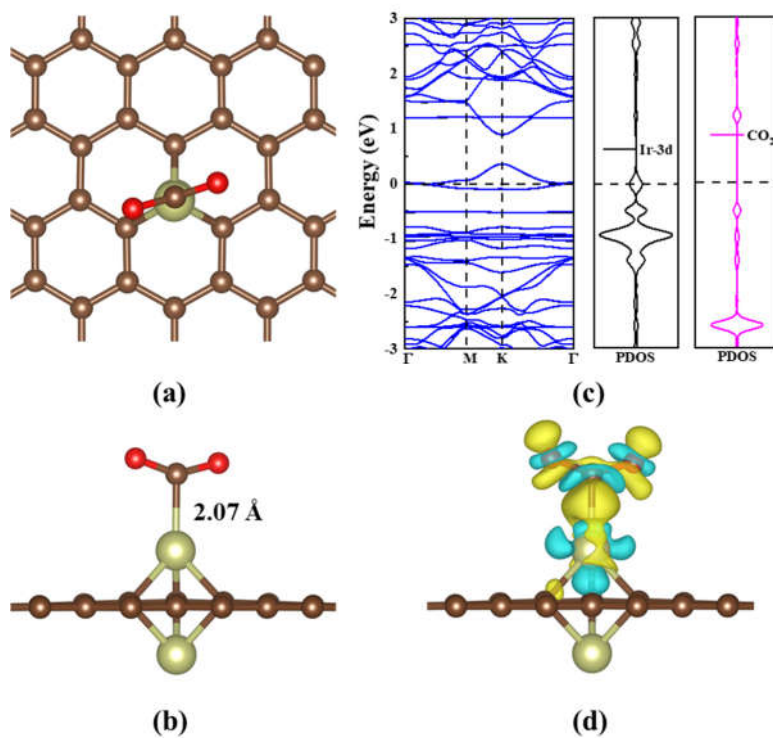

**Fig. S41** The most favorable configuration of CO<sub>2</sub> adsorption energy on the Ir<sub>2</sub>⊥ gra structure (top view (a) and side view (b)), energy band structure and PDOS (c), and CDD diagram (d). The isosurface value was set  $0.003 \text{ e}/\text{\AA}^{-3}$ .

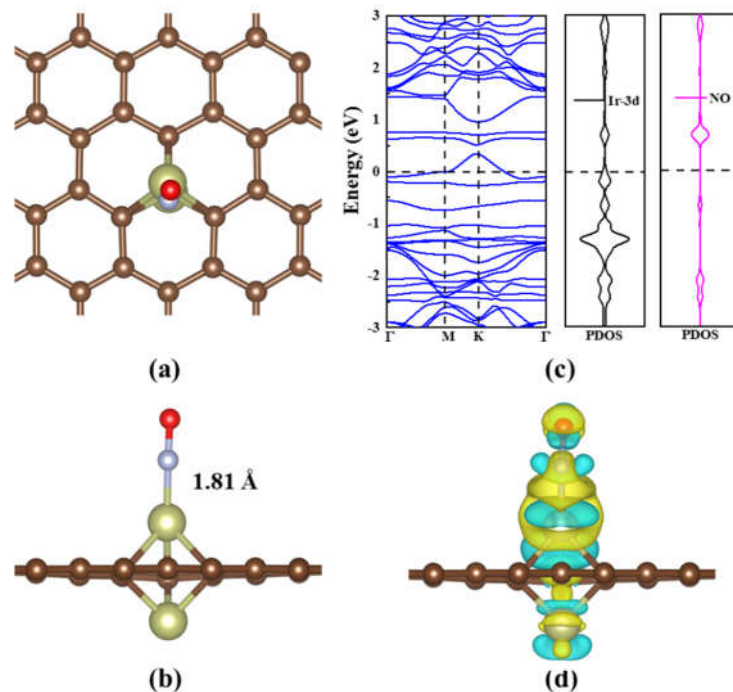

**Fig. S42** The most favorable configuration of NO adsorption energy on the Ir<sub>2</sub>L gra structure (top view (a) and side view (b)), energy band structure and PDOS (c), and CDD diagram (d). The isosurface value was set  $0.003 \text{ e}/\text{\AA}^{-3}$ .

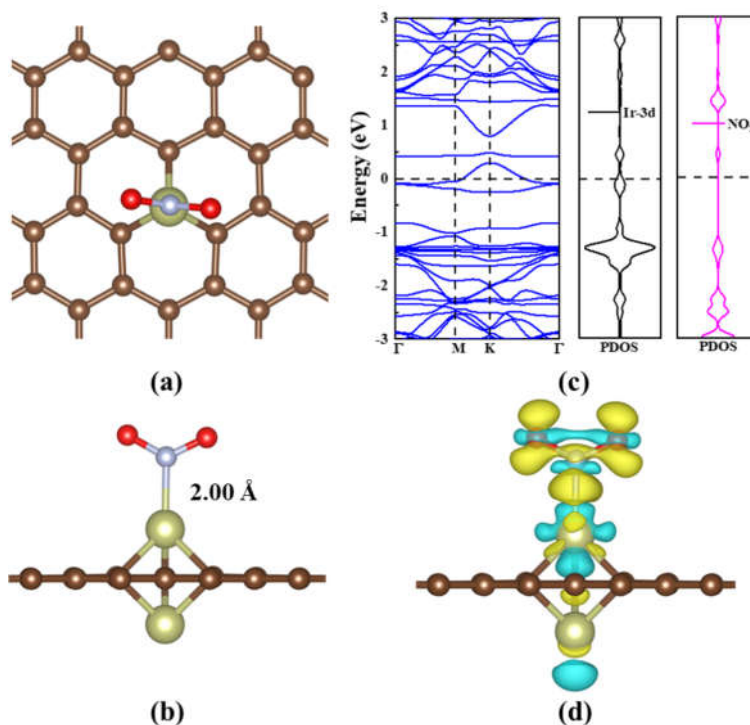

**Fig. S43** The most favorable configuration of NO<sub>2</sub> adsorption energy on the Ir<sub>2</sub>L gra structure (top view (a) and side view (b)), energy band structure and PDOS (c), and CDD diagram (d). The isosurface value was set  $0.003 \text{ e}/\text{\AA}^{-3}$ .

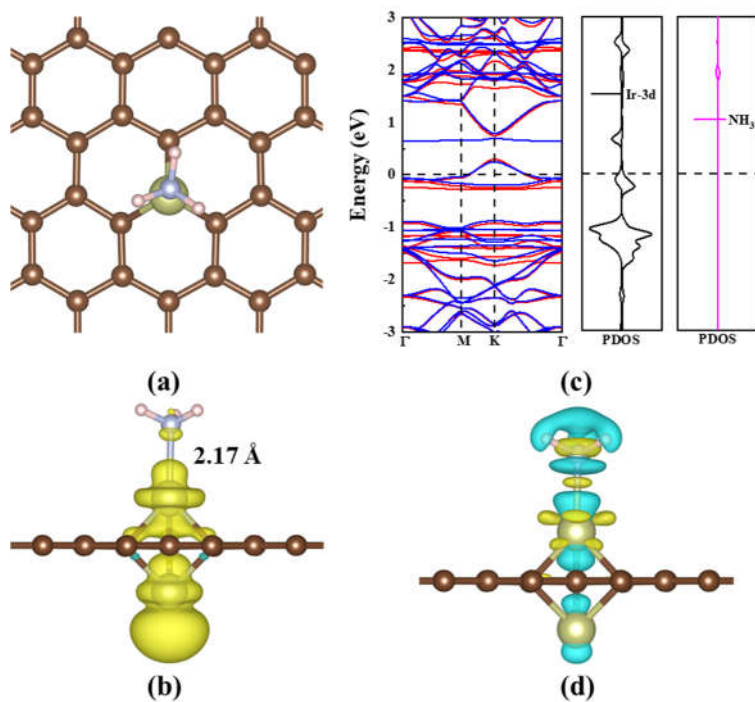

**Fig. S44** The most favorable configuration of NH<sub>3</sub> adsorption energy on the Ir<sub>2</sub>⊥ gra structure (top view (a)), spatial spin density distributions (b), energy band structure and PDOS (c), and CDD diagram (d). The isosurface value was set  $0.003 \text{ e}/\text{\AA}^{-3}$ .

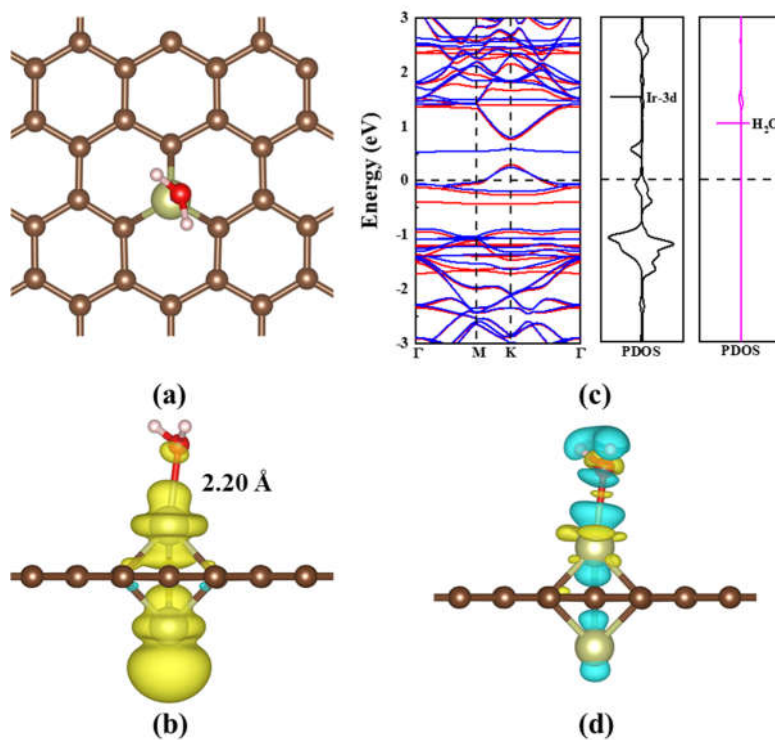

**Fig. S45** The most favorable configuration of H<sub>2</sub>O adsorption energy on the Ir<sub>2</sub>⊥ gra structure (top view (a)), spatial spin density distributions (b), energy band structure and PDOS (c), and CDD diagram (d). The isosurface value was set  $0.003 \text{ e}/\text{\AA}^{-3}$ .

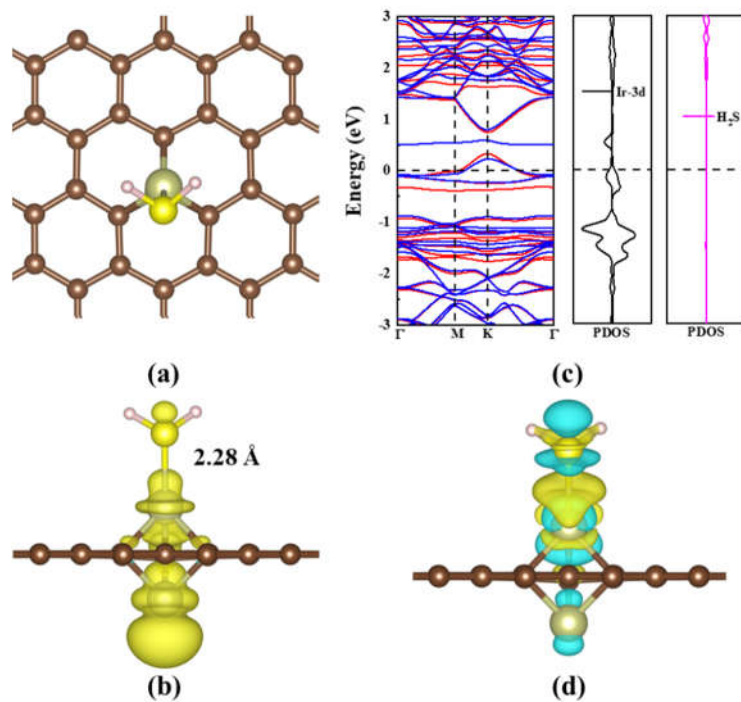

**Fig. S46** The most favorable configuration of H<sub>2</sub>S adsorption energy on the Ir<sub>2</sub>L gra structure (top view (a)), spatial spin density distributions (b), energy band structure and PDOS (c), and CDD diagram (d). The isosurface value was set  $0.003 \text{ e}/\text{\AA}^{-3}$ .

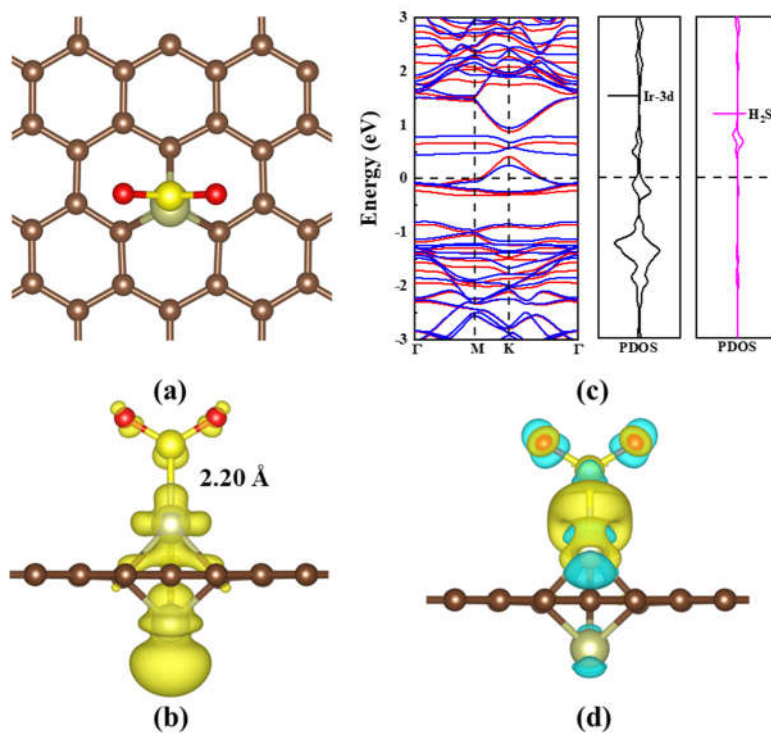

**Fig. S47** The most favorable configuration of SO<sub>2</sub> adsorption energy on the Ir<sub>2</sub>L gra structure (top view (a)), spatial spin density distributions (b), energy band structure and PDOS (c), and CDD diagram (d). The isosurface value was set  $0.003 \text{ e}/\text{\AA}^{-3}$ .

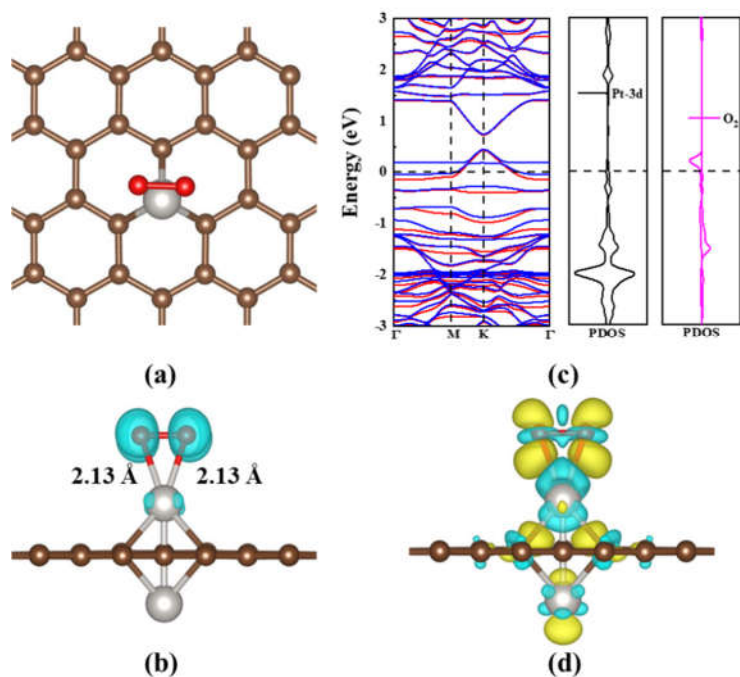

**Fig. S48** The most favorable configuration of O<sub>2</sub> adsorption energy on the Pt<sub>2</sub>⊥ gra structure (top view (a)), spatial spin density distributions (b), energy band structure and PDOS (c), and CDD diagram (d). The isosurface value was set  $0.003 \text{ e}/\text{\AA}^{-3}$ .

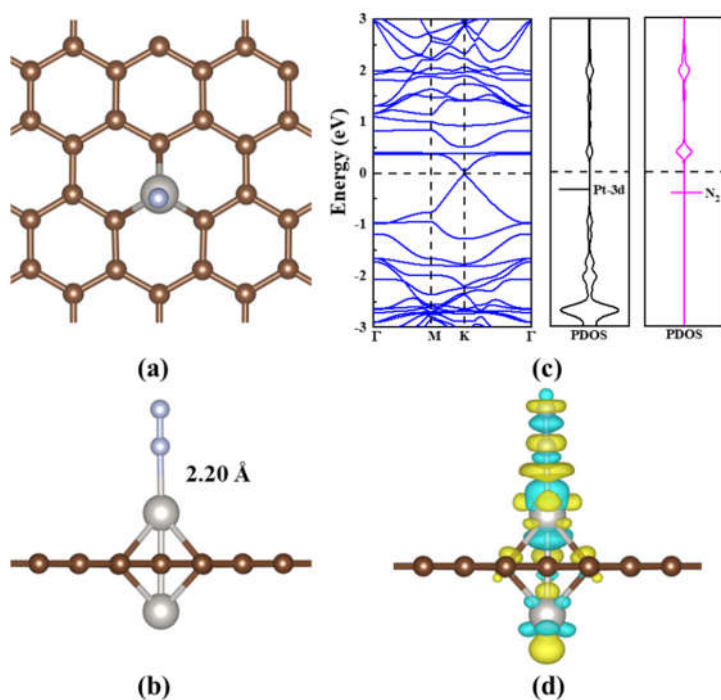

**Fig. S49** The most favorable configuration of N<sub>2</sub> adsorption energy on the Pt<sub>2</sub>⊥ gra structure (top view (a) and side view (b)), energy band structure and PDOS (c), and CDD diagram (d). The isosurface value was set  $0.003 \text{ e}/\text{\AA}^{-3}$ .

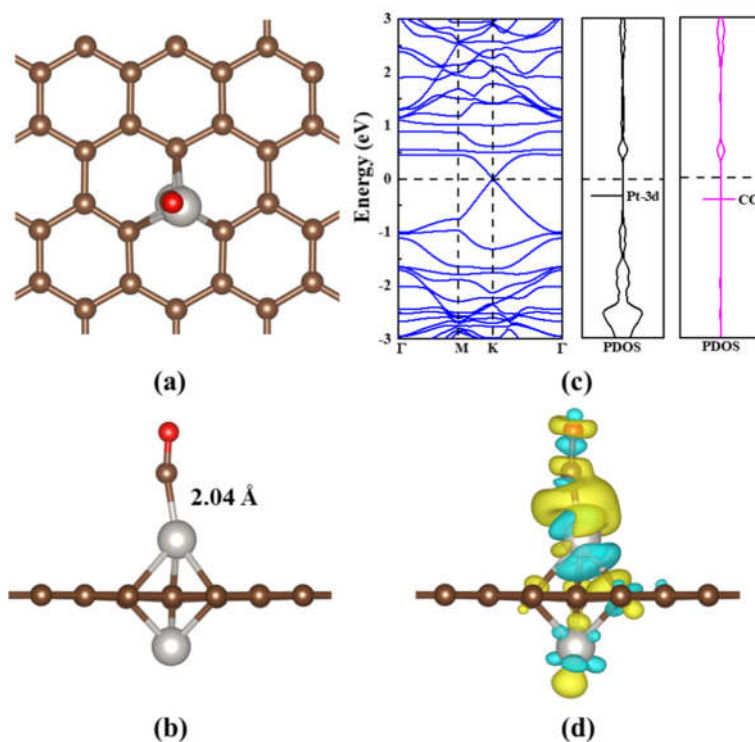

**Fig. S50** The most favorable configuration of CO adsorption energy on the Pt<sub>2</sub>L gra structure (top view (a) and side view (b)), energy band structure and PDOS (c), and CDD diagram (d). The isosurface value was set  $0.003 \text{ e}/\text{\AA}^{-3}$ .

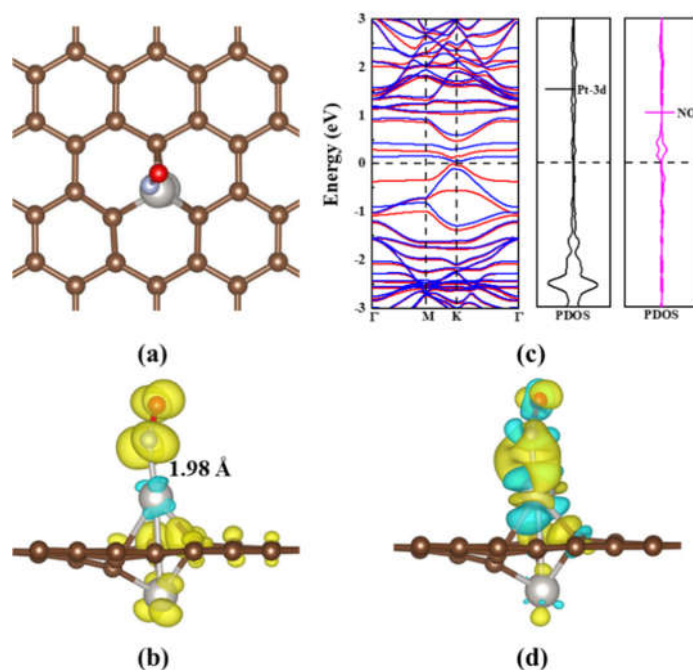

**Fig. S51** The most favorable configuration of NO adsorption energy on the Pt<sub>2</sub>L gra structure (top view (a)), spatial spin density distributions (b), energy band structure and PDOS (c), CDD diagram (d). The isosurface value was set  $0.003 \text{ e}/\text{\AA}^{-3}$ .

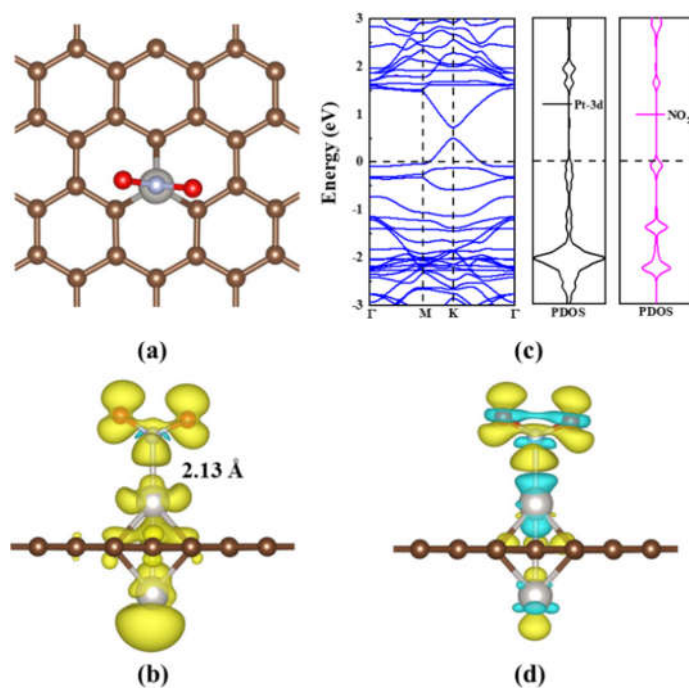

**Fig. S52** The most favorable configuration of NO<sub>2</sub> adsorption energy on the Pt<sub>2</sub>L gra structure (top view (a)), spatial spin density distributions (b), energy band structure and PDOS (c), and CDD diagram (d). The isosurface value was set  $0.0003 \text{ e}/\text{\AA}^{-3}$  for spatial spin density distributions and  $0.003 \text{ e}/\text{\AA}^{-3}$  for CDD, respectively.

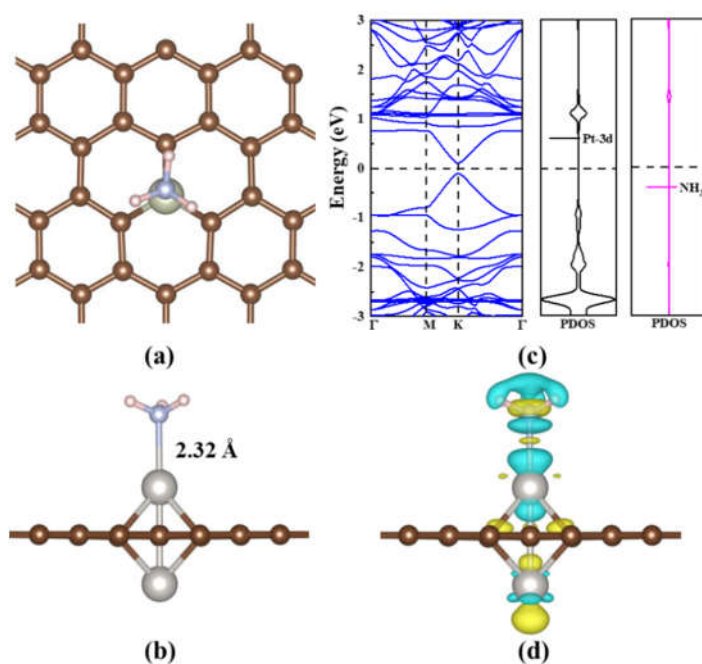

**Fig. S53** The most favorable configuration of NH<sub>3</sub> adsorption energy on the Pt<sub>2</sub>L gra structure (top view (a) and side view (b)), energy band structure and PDOS (c), and CDD diagram (d). The isosurface value was set  $0.003 \text{ e}/\text{\AA}^{-3}$ .



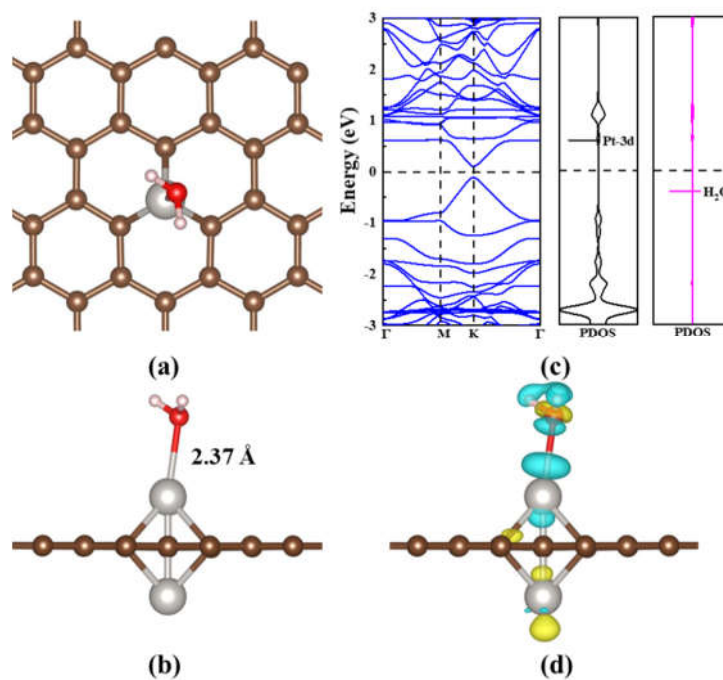

**Fig. S54** The most favorable configuration of H<sub>2</sub>O adsorption energy on the Pt<sub>2</sub>L gra structure (top view (a) and side view (b)), energy band structure and PDOS (c), and CDD diagram (d). The isosurface value was set  $0.003 \text{ e}/\text{\AA}^{-3}$ .

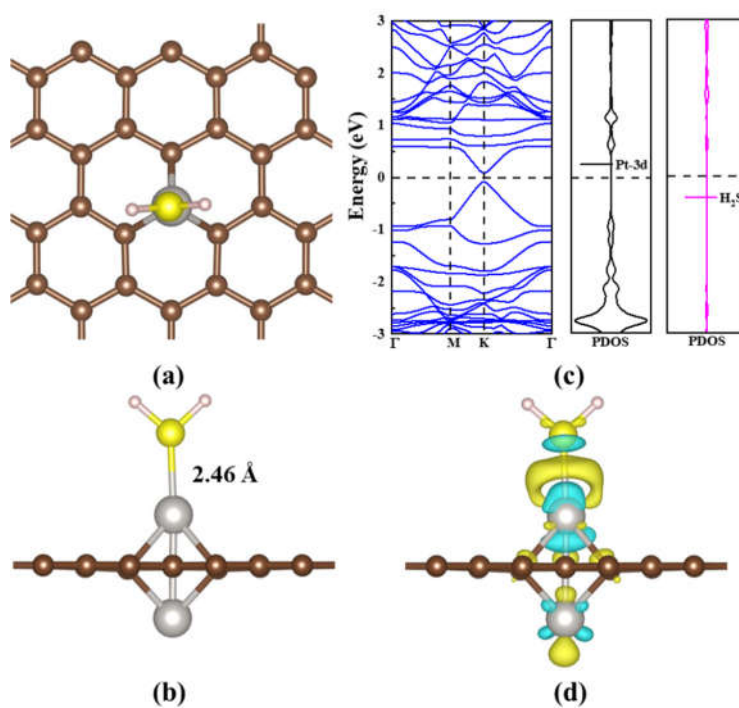

**Fig. S55** The most favorable configuration of H<sub>2</sub>S adsorption energy on the Pt<sub>2</sub>L gra structure (top view (a) and side view (b)), energy band structure and PDOS (c), and CDD diagram (d). The isosurface value was set  $0.003 \text{ e}/\text{\AA}^{-3}$ .

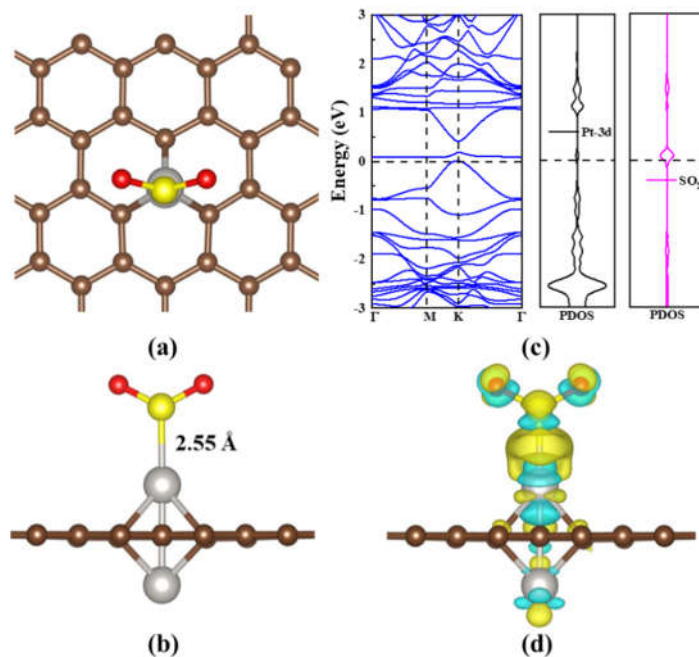

**Fig. S56** The most favorable configuration of SO<sub>2</sub> adsorption energy on the Pt<sub>2</sub>⊥ gra structure (top view (a) and side view (b)), energy band structure and PDOS (c), and CDD diagram (d). The isosurface value was set 0.003 e/Å<sup>-3</sup>.

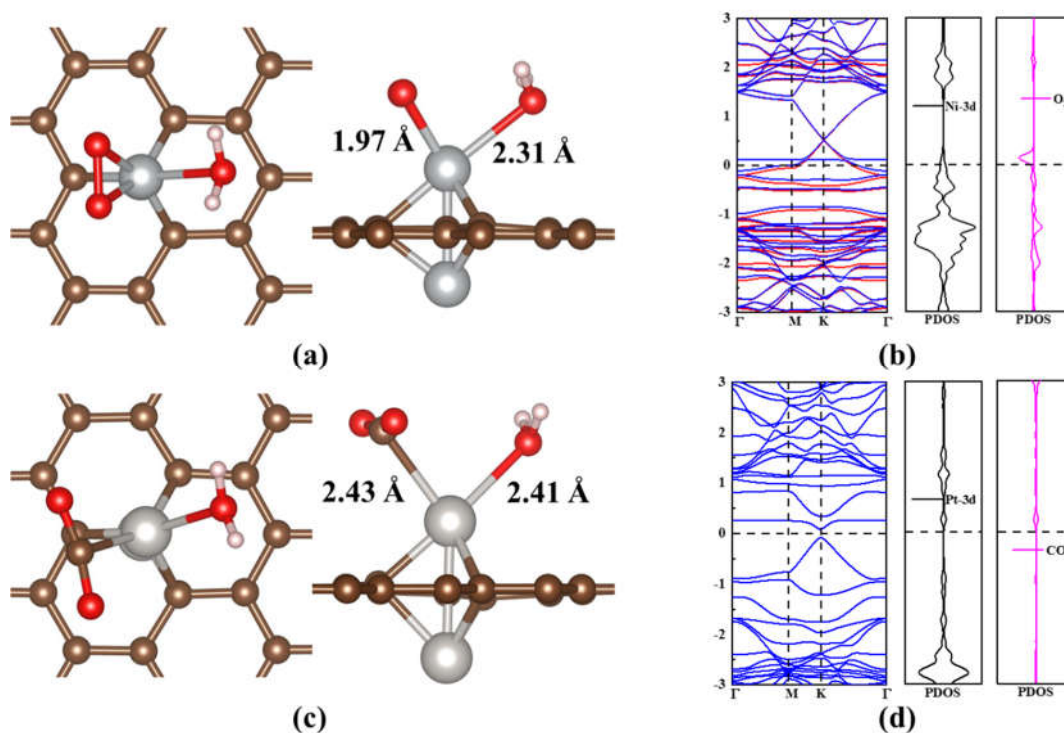

**Fig. S57** The most favorable configuration of O<sub>2</sub>/CO<sub>2</sub> and H<sub>2</sub>O co-adsorption on the Ni<sub>2</sub>⊥ gra/Pt<sub>2</sub>⊥ gra structure (a/c), and their corresponding energy band structure and PDOS (b/d).
